# Supplementary material for: A straightforward synthesis of unsymmetrical secondary phosphine boranes
Source: Royal Society of Chemistry journal article supplement (doi:10.1039/b920324a), 2010-01-01

Supporting information

## **A Straightforward Synthesis of Unsymmetrical Secondary Phosphine Boranes**

**Christelle Petit,<sup>a</sup> Alain Favre-Réguillon,<sup>b,\*</sup> Gérard Mignani,<sup>c</sup> and Marc Lemaire<sup>a,\*</sup>**

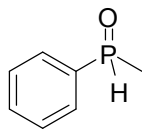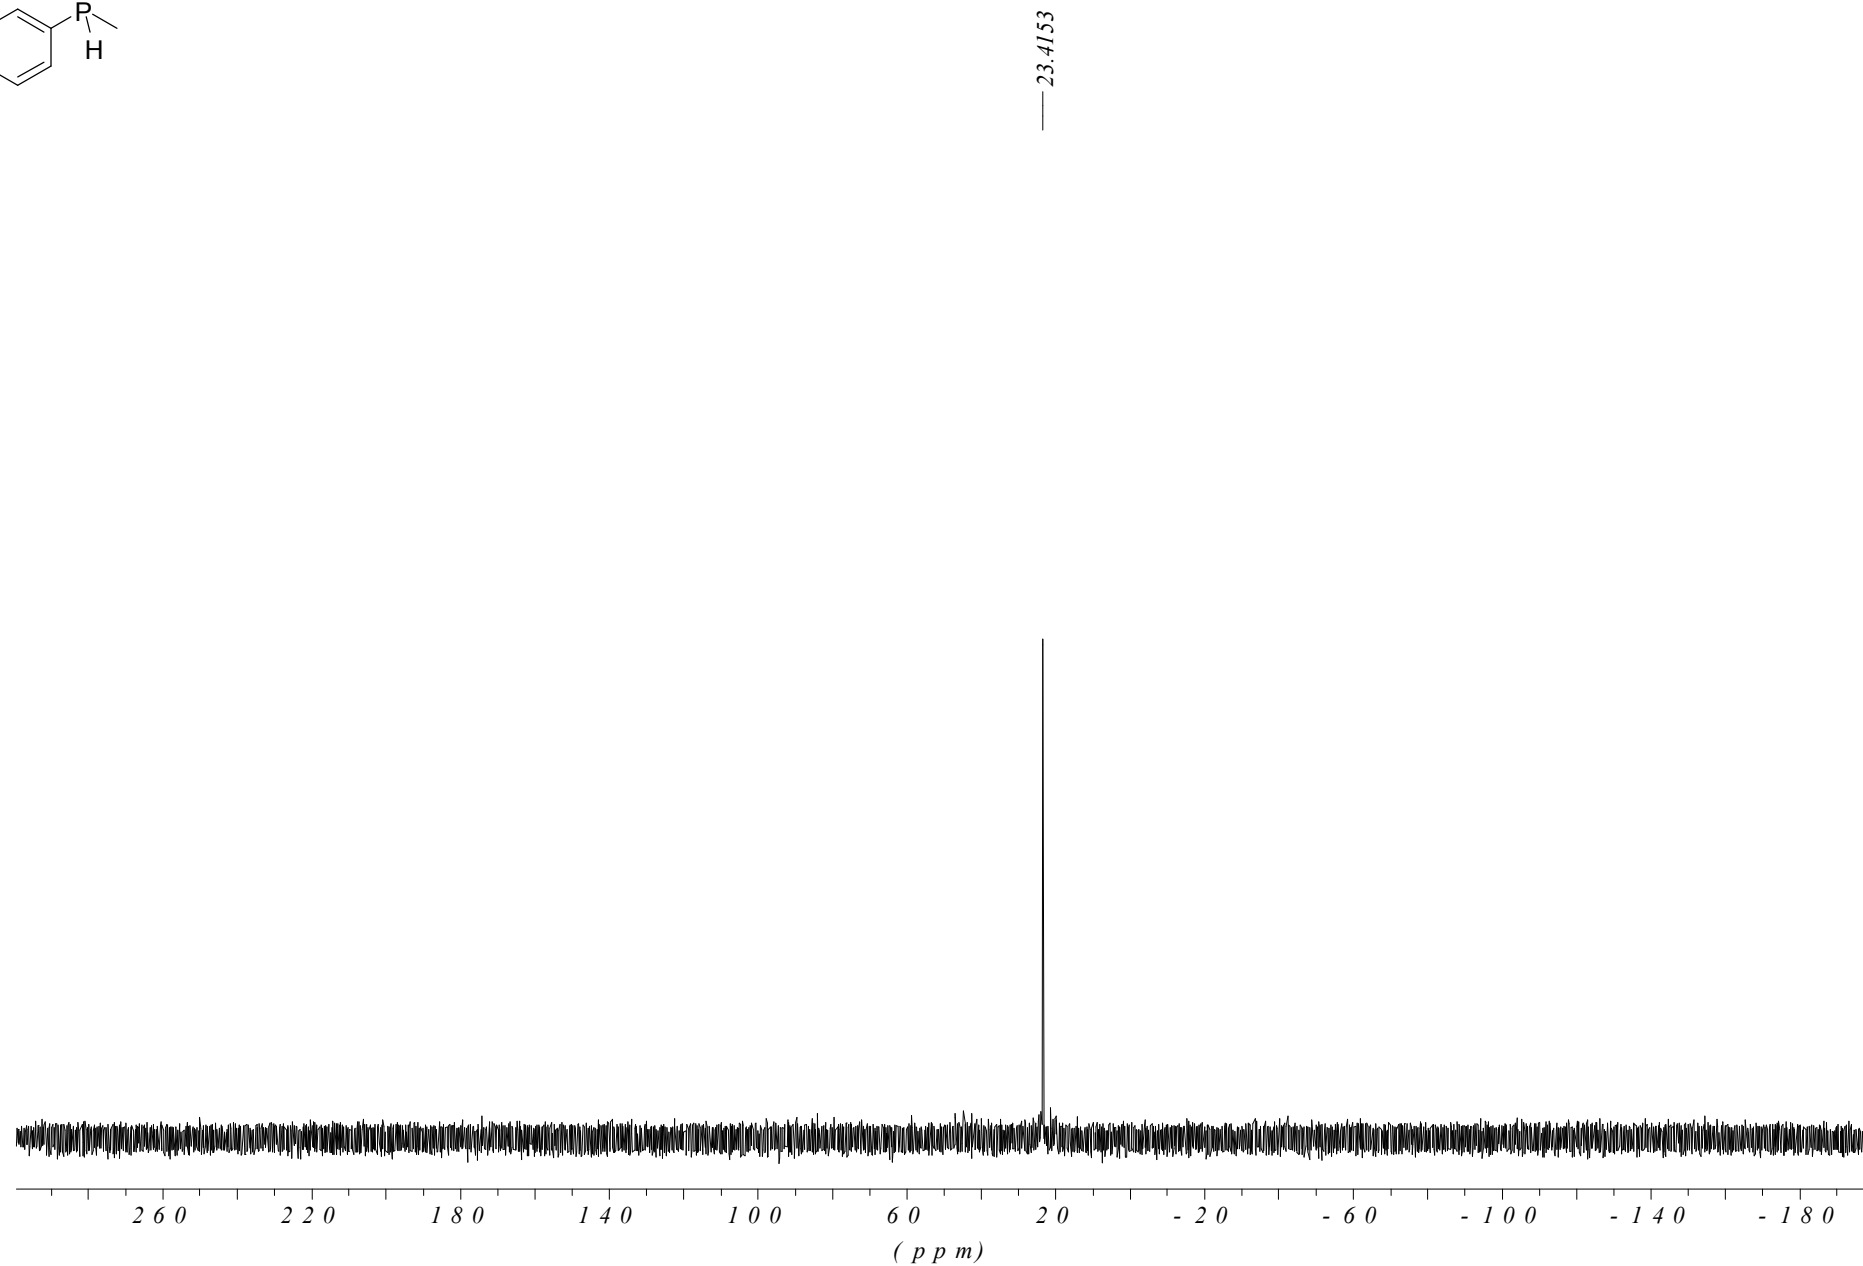

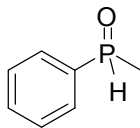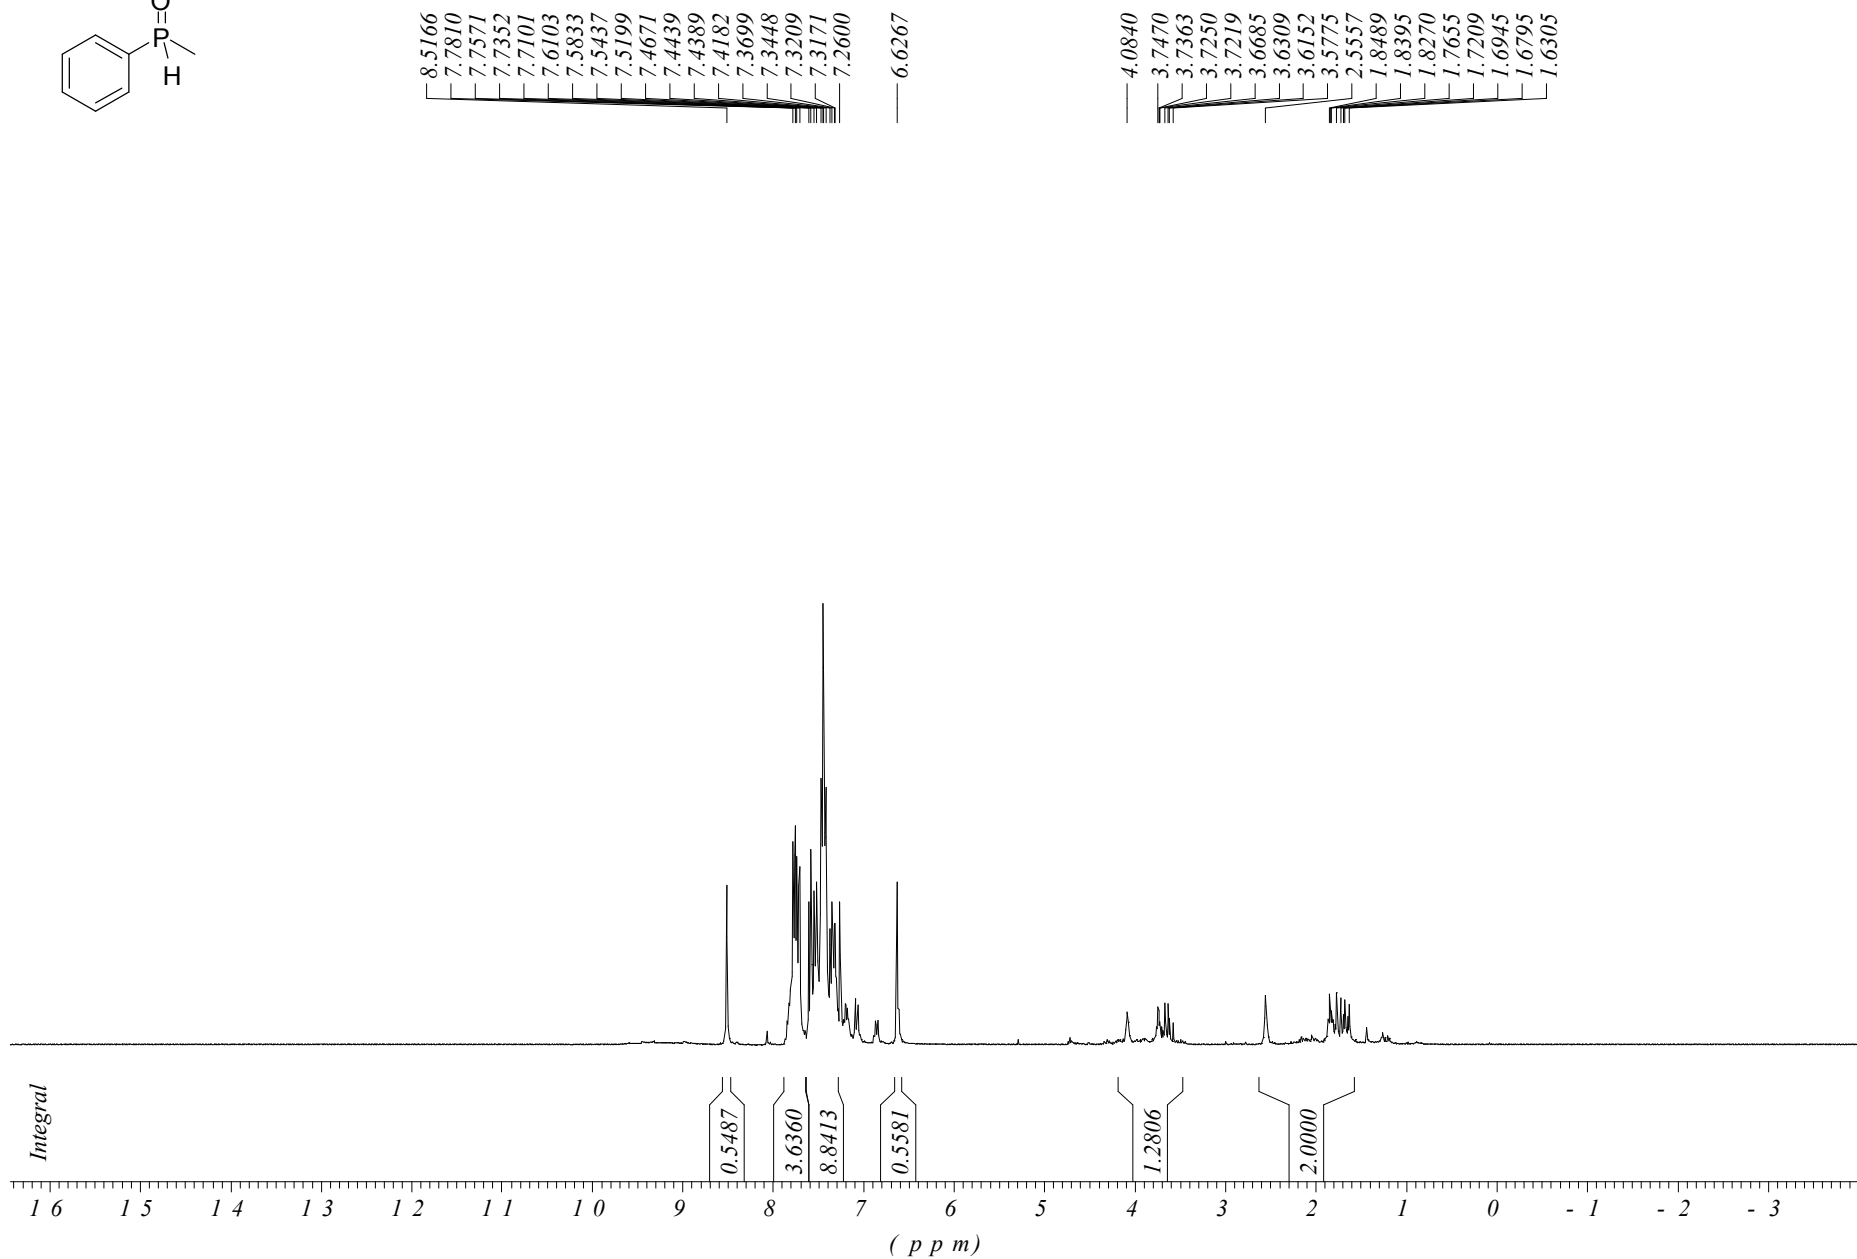

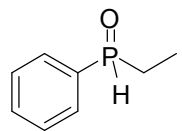

— 32.0517

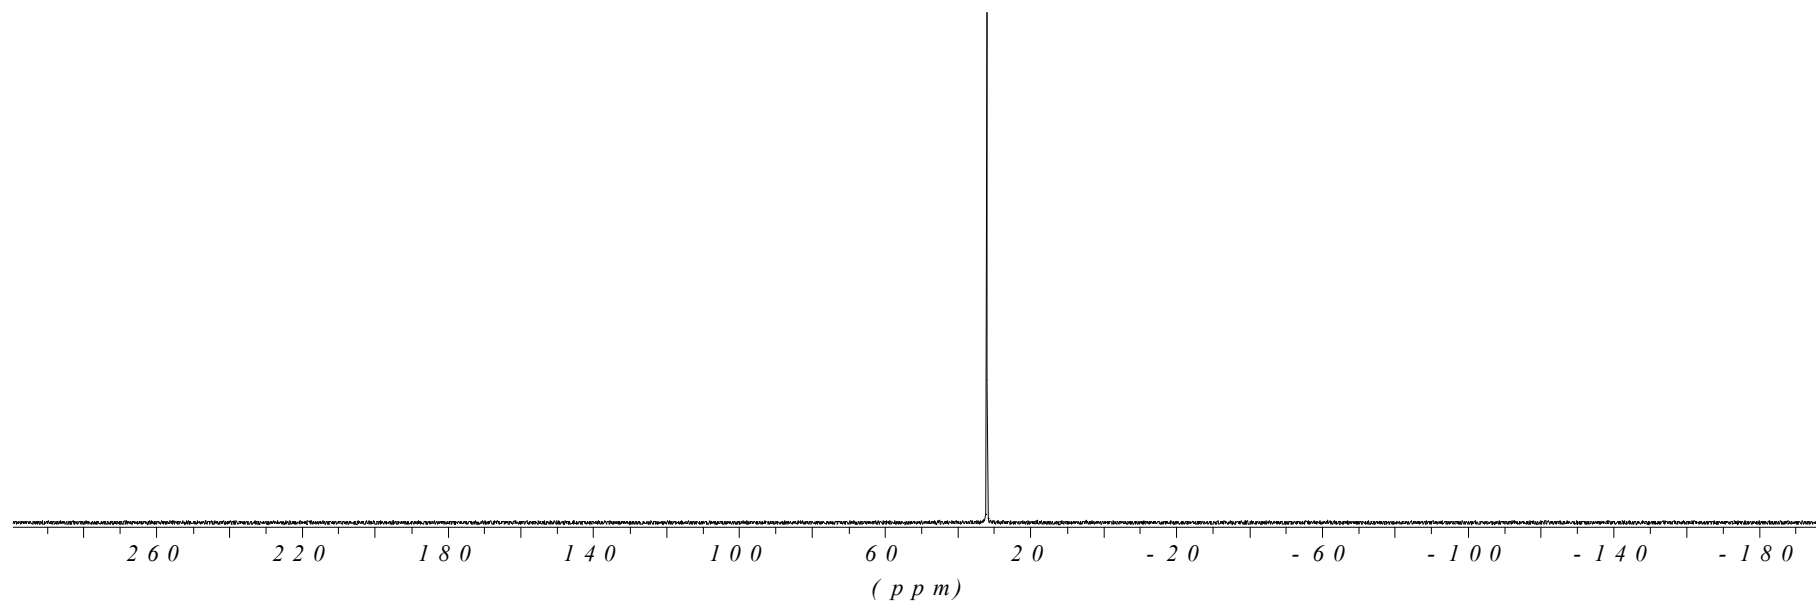

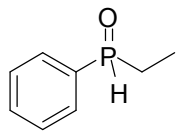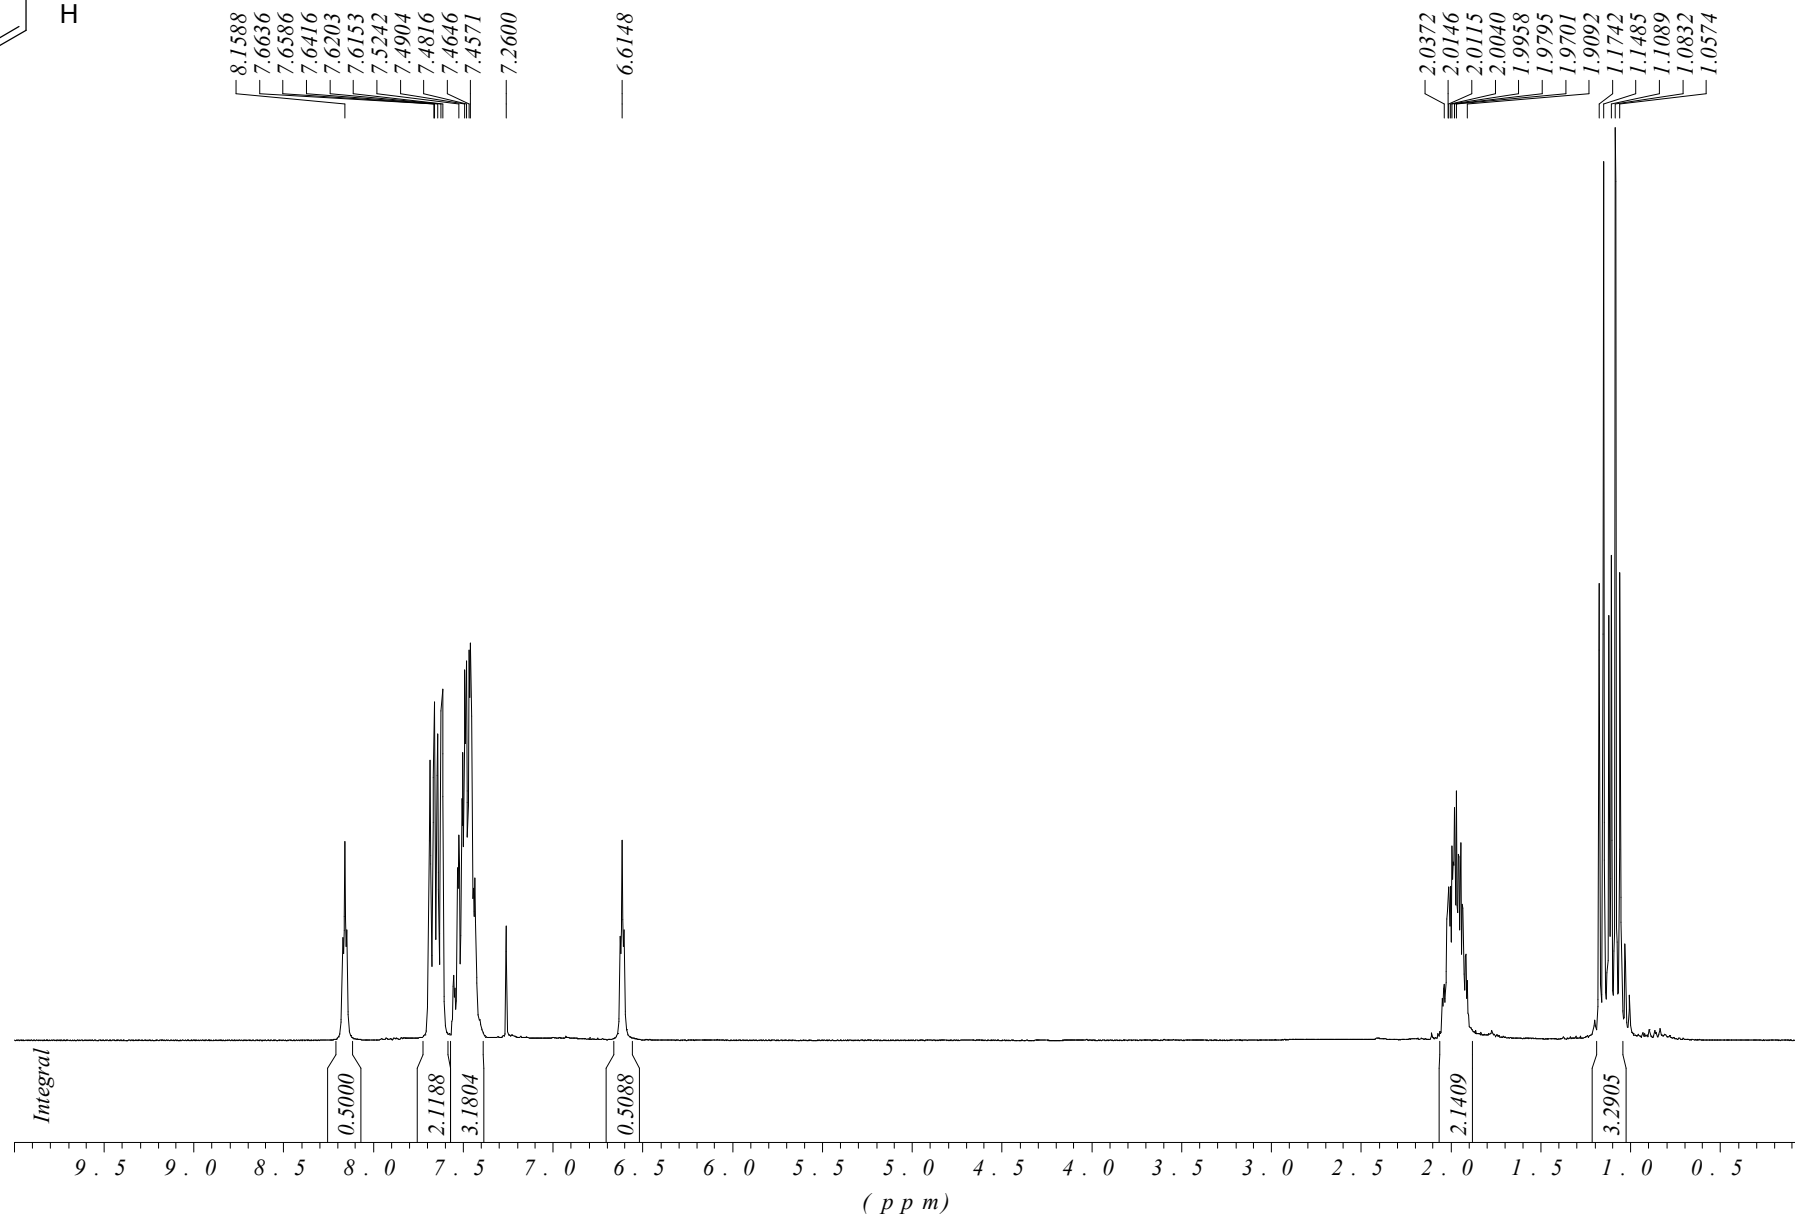



Supplementary Material (ESI) for Green Chemistry  
This journal is © The Royal Society of Chemistry 2010

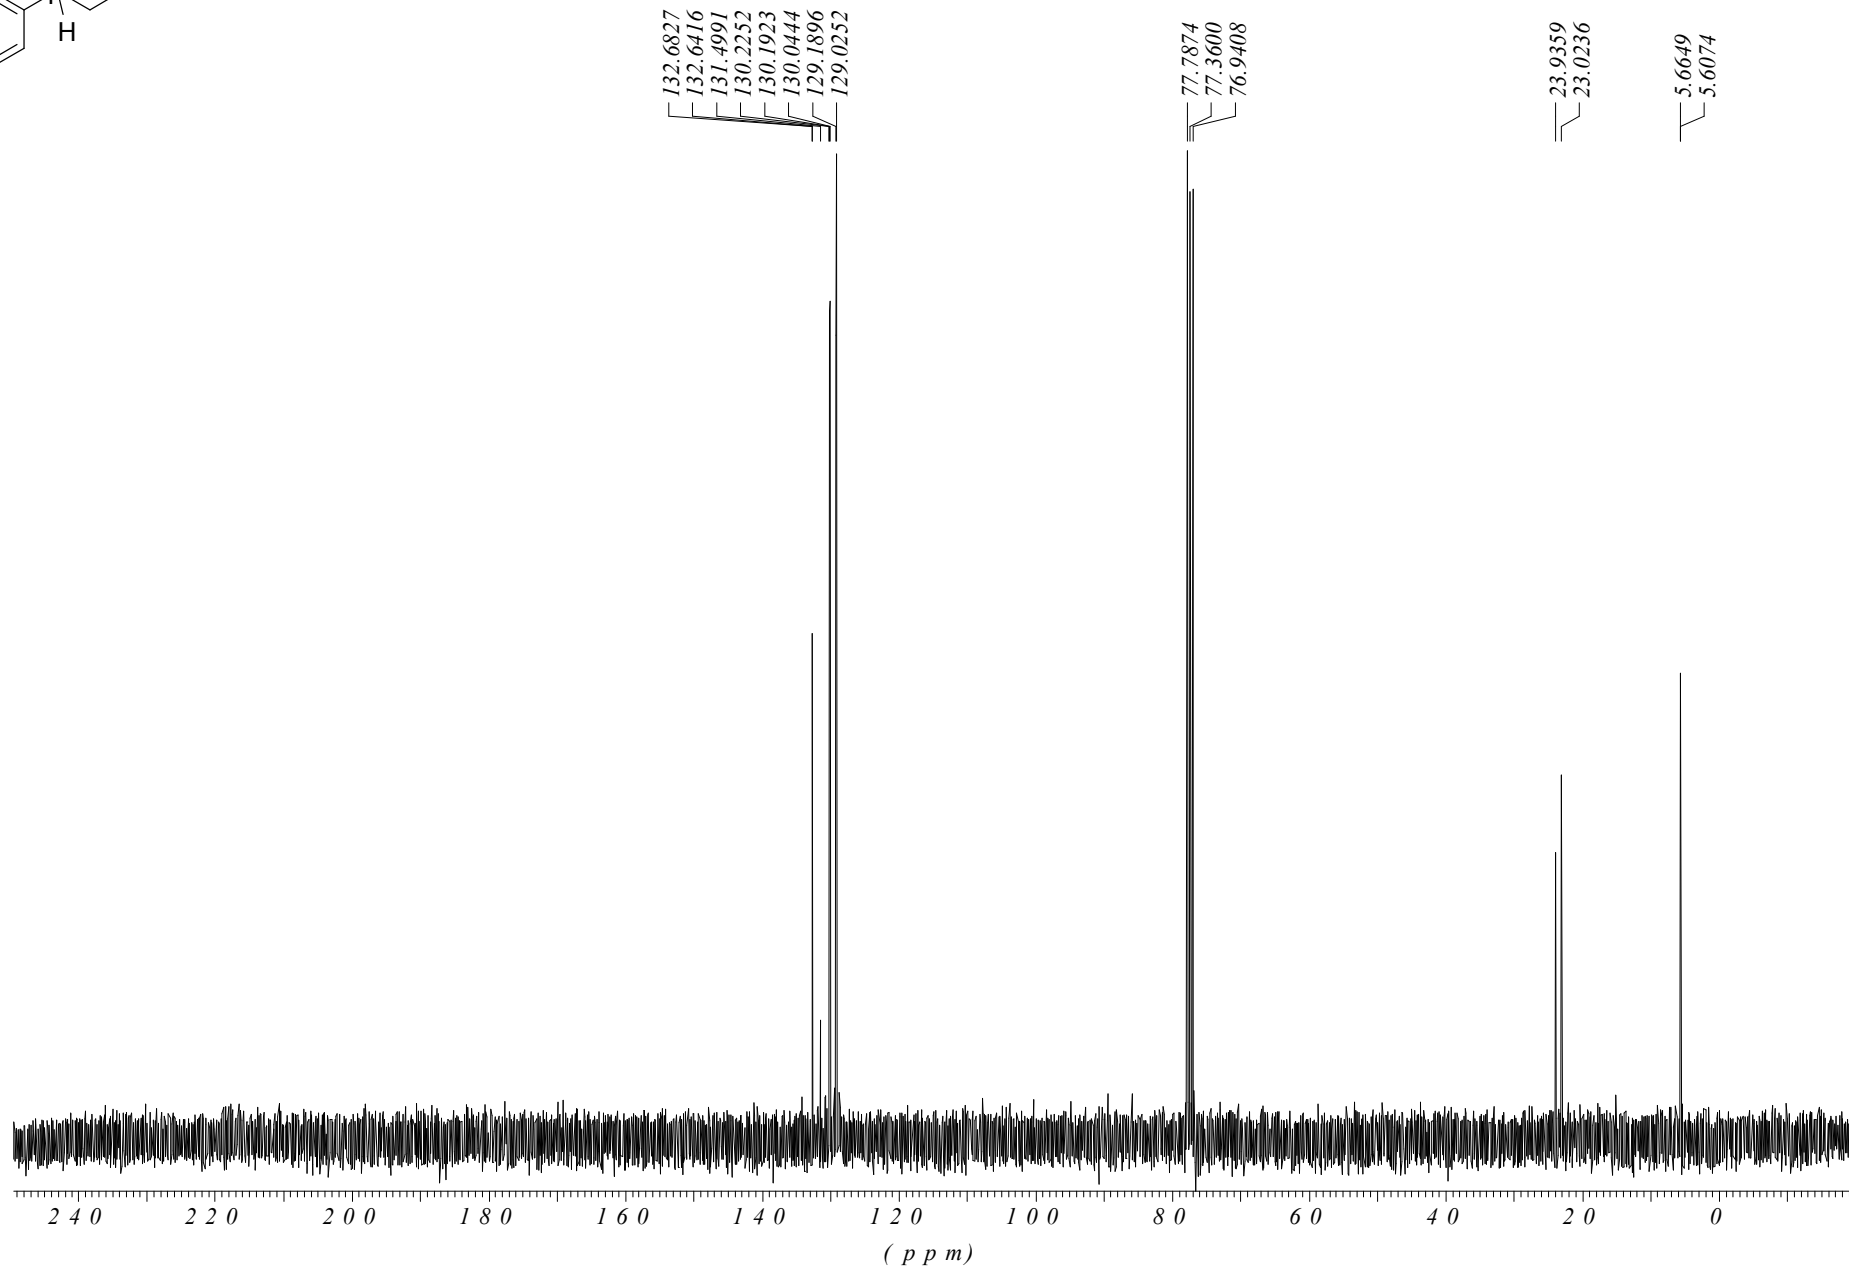

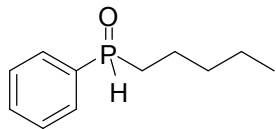

Supplementary Material (ESI) for Green Chemistry  
This journal is © The Royal Society of Chemistry 2010

— 29,0022

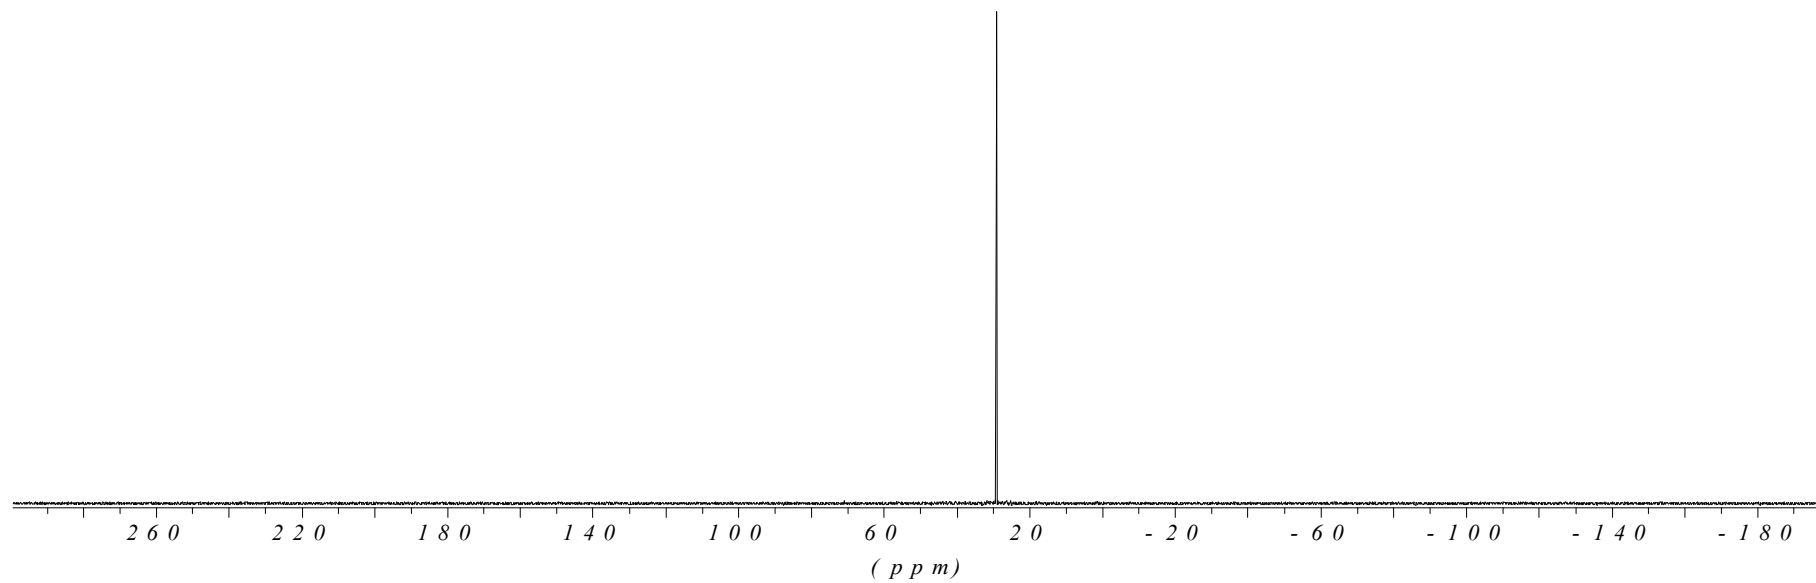

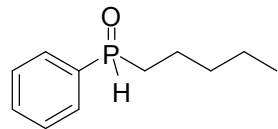

Supplementary Material (ESI) for Green Chemistry  
This journal is © The Royal Society of Chemistry 2010

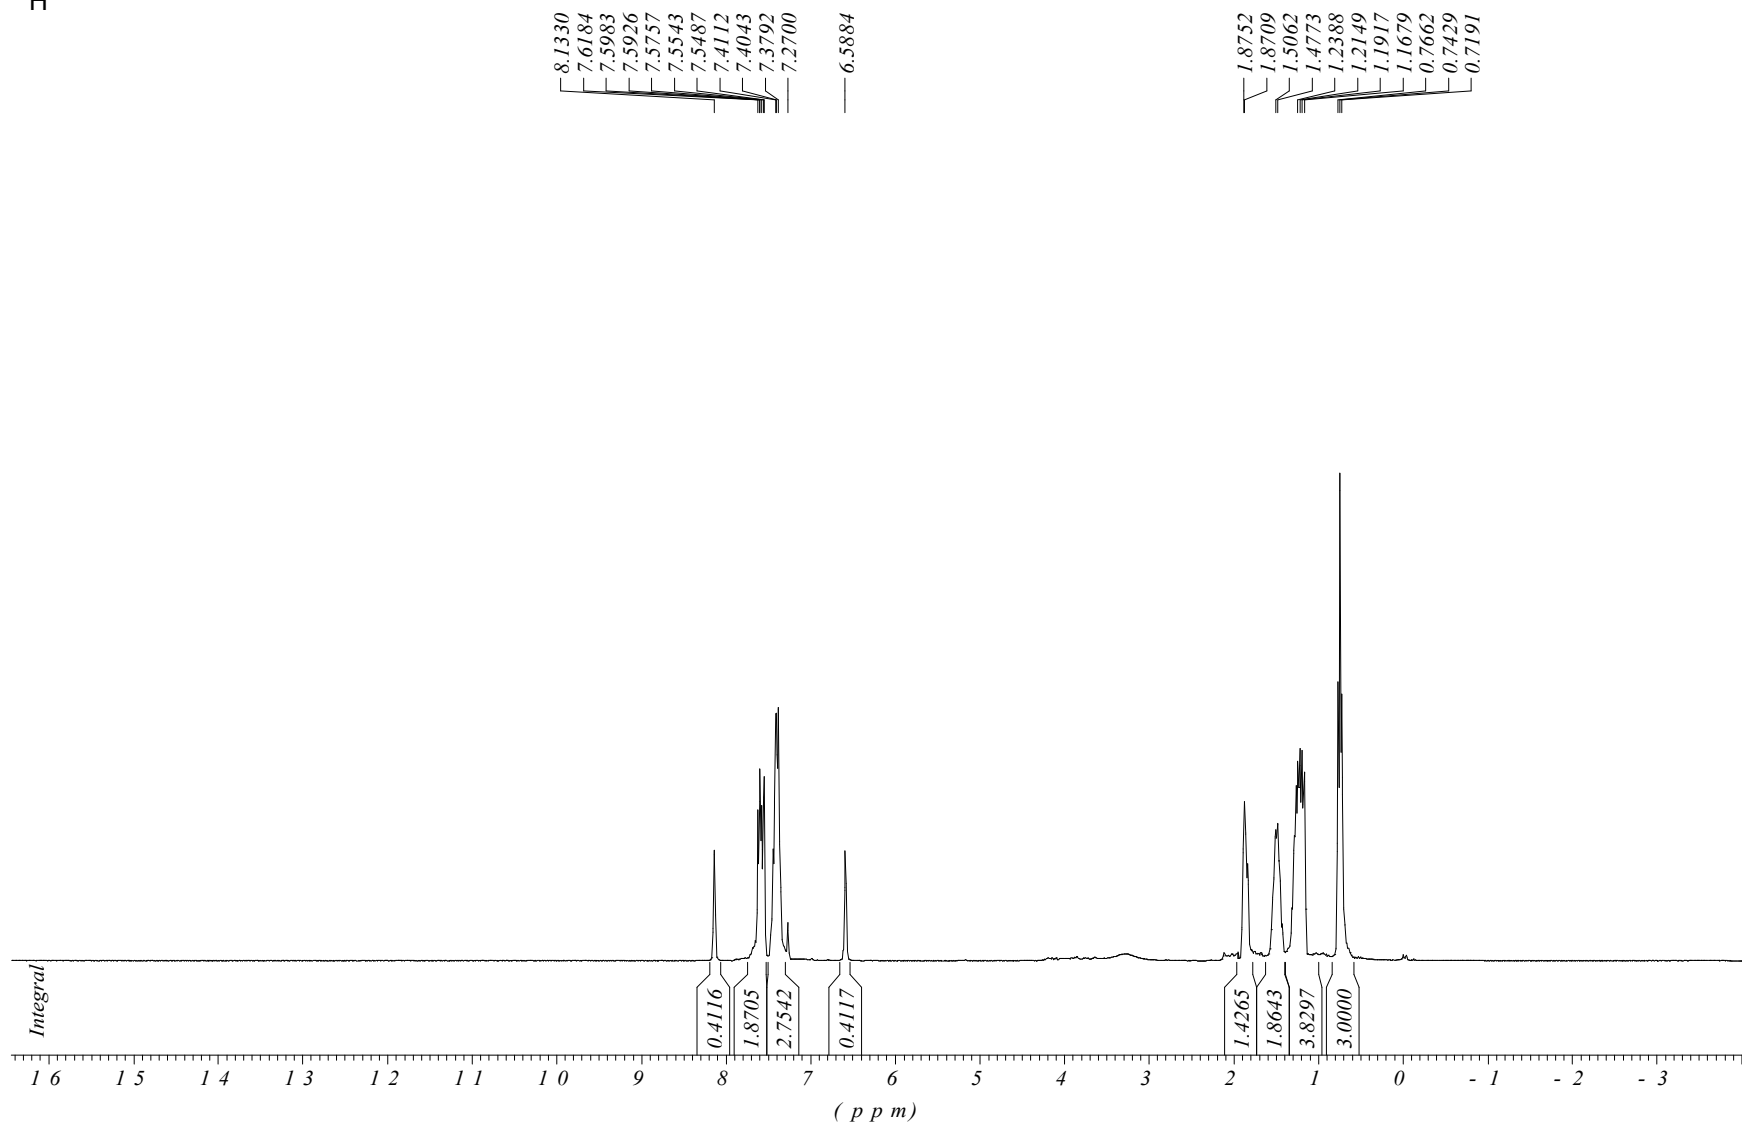



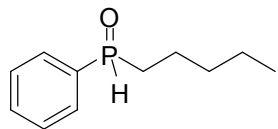

132.4115  
132.3704  
131.7539  
130.4800  
129.9293  
129.7896  
128.9759  
128.8115

77.7874  
77.3600  
76.9326

60.3136

32.7715  
32.5824  
30.6920  
29.7879  
22.1360  
21.1908  
21.1414  
20.9853  
14.1799  
13.7525

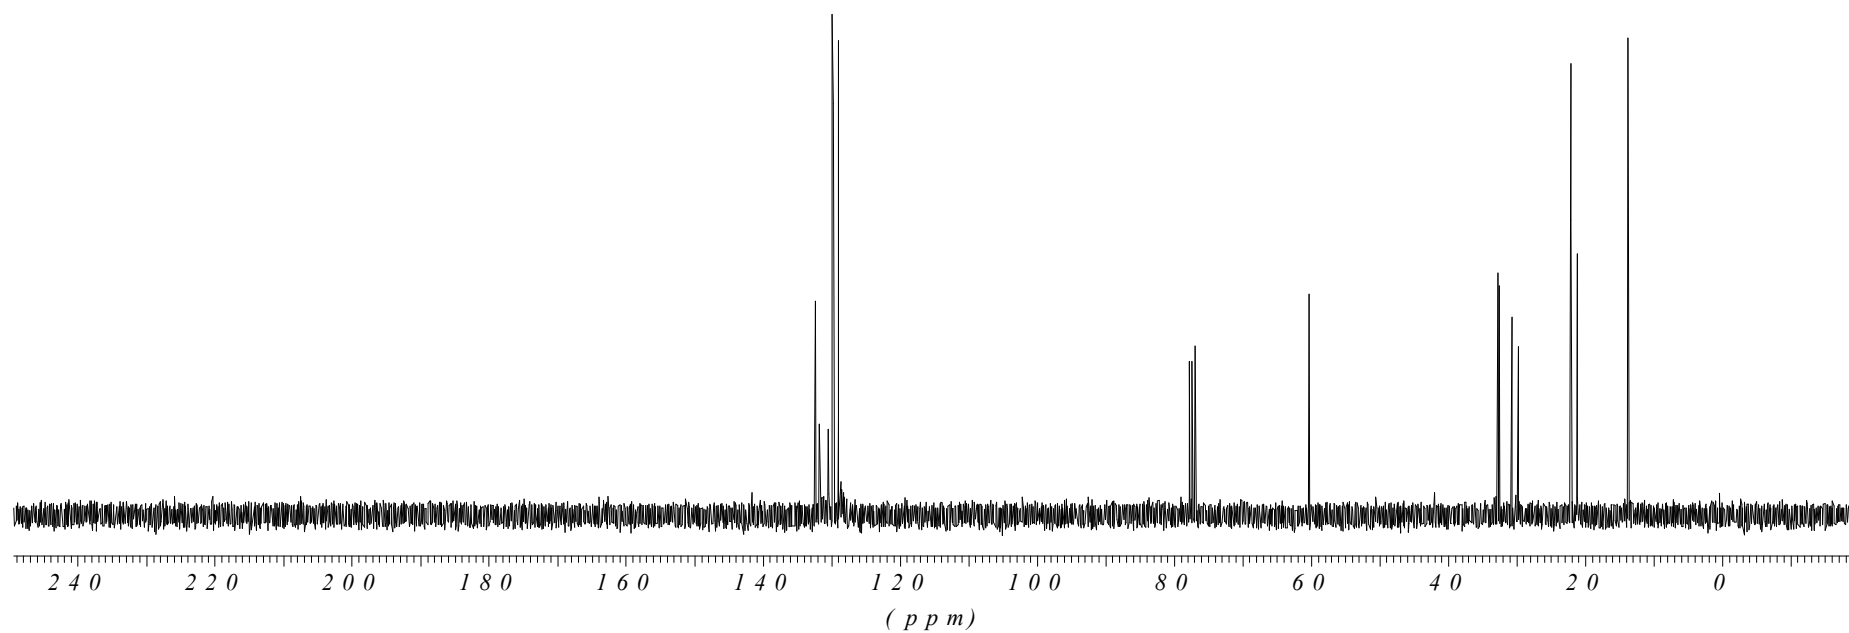

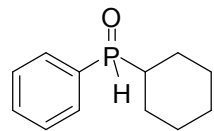

Supplementary Material (ESI) for Green Chemistry  
This journal is © The Royal Society of Chemistry 2010

— 37.8822

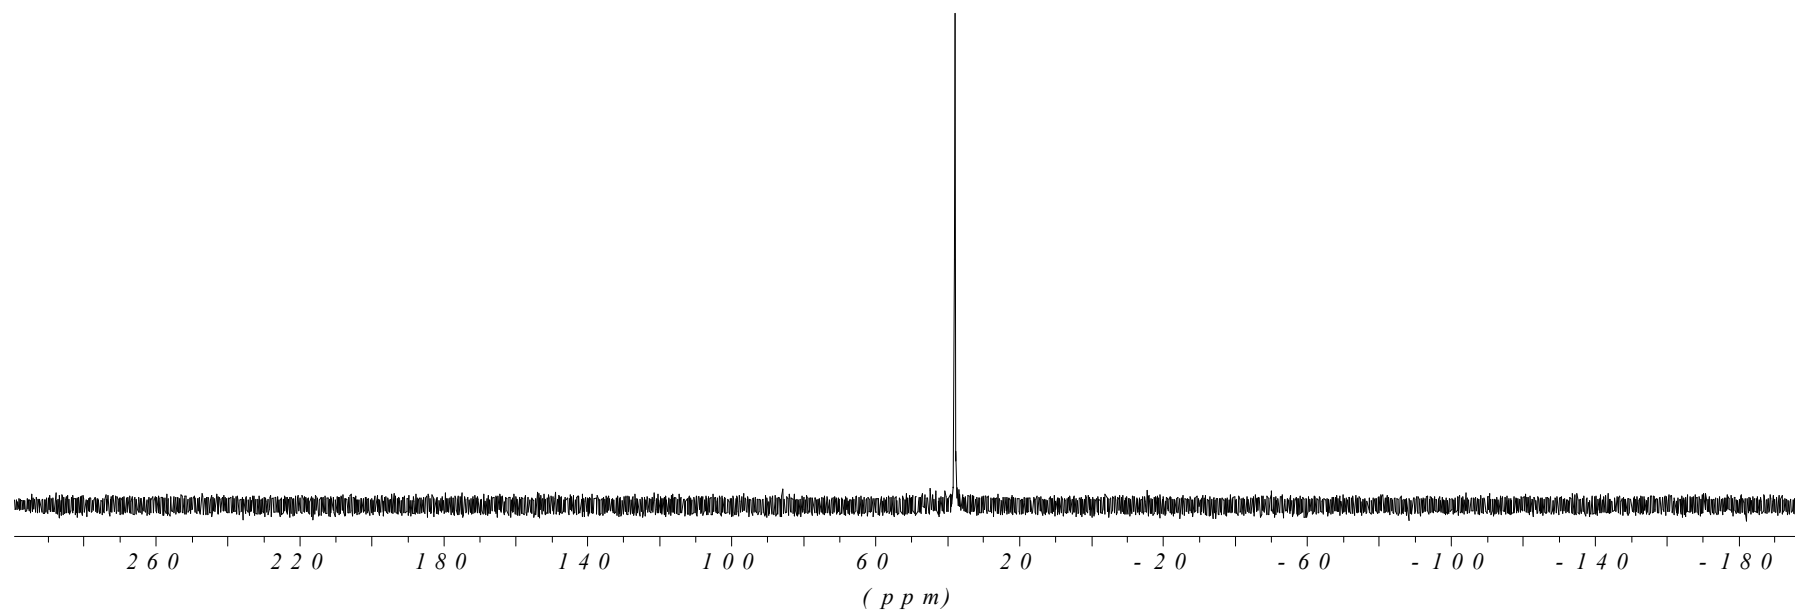

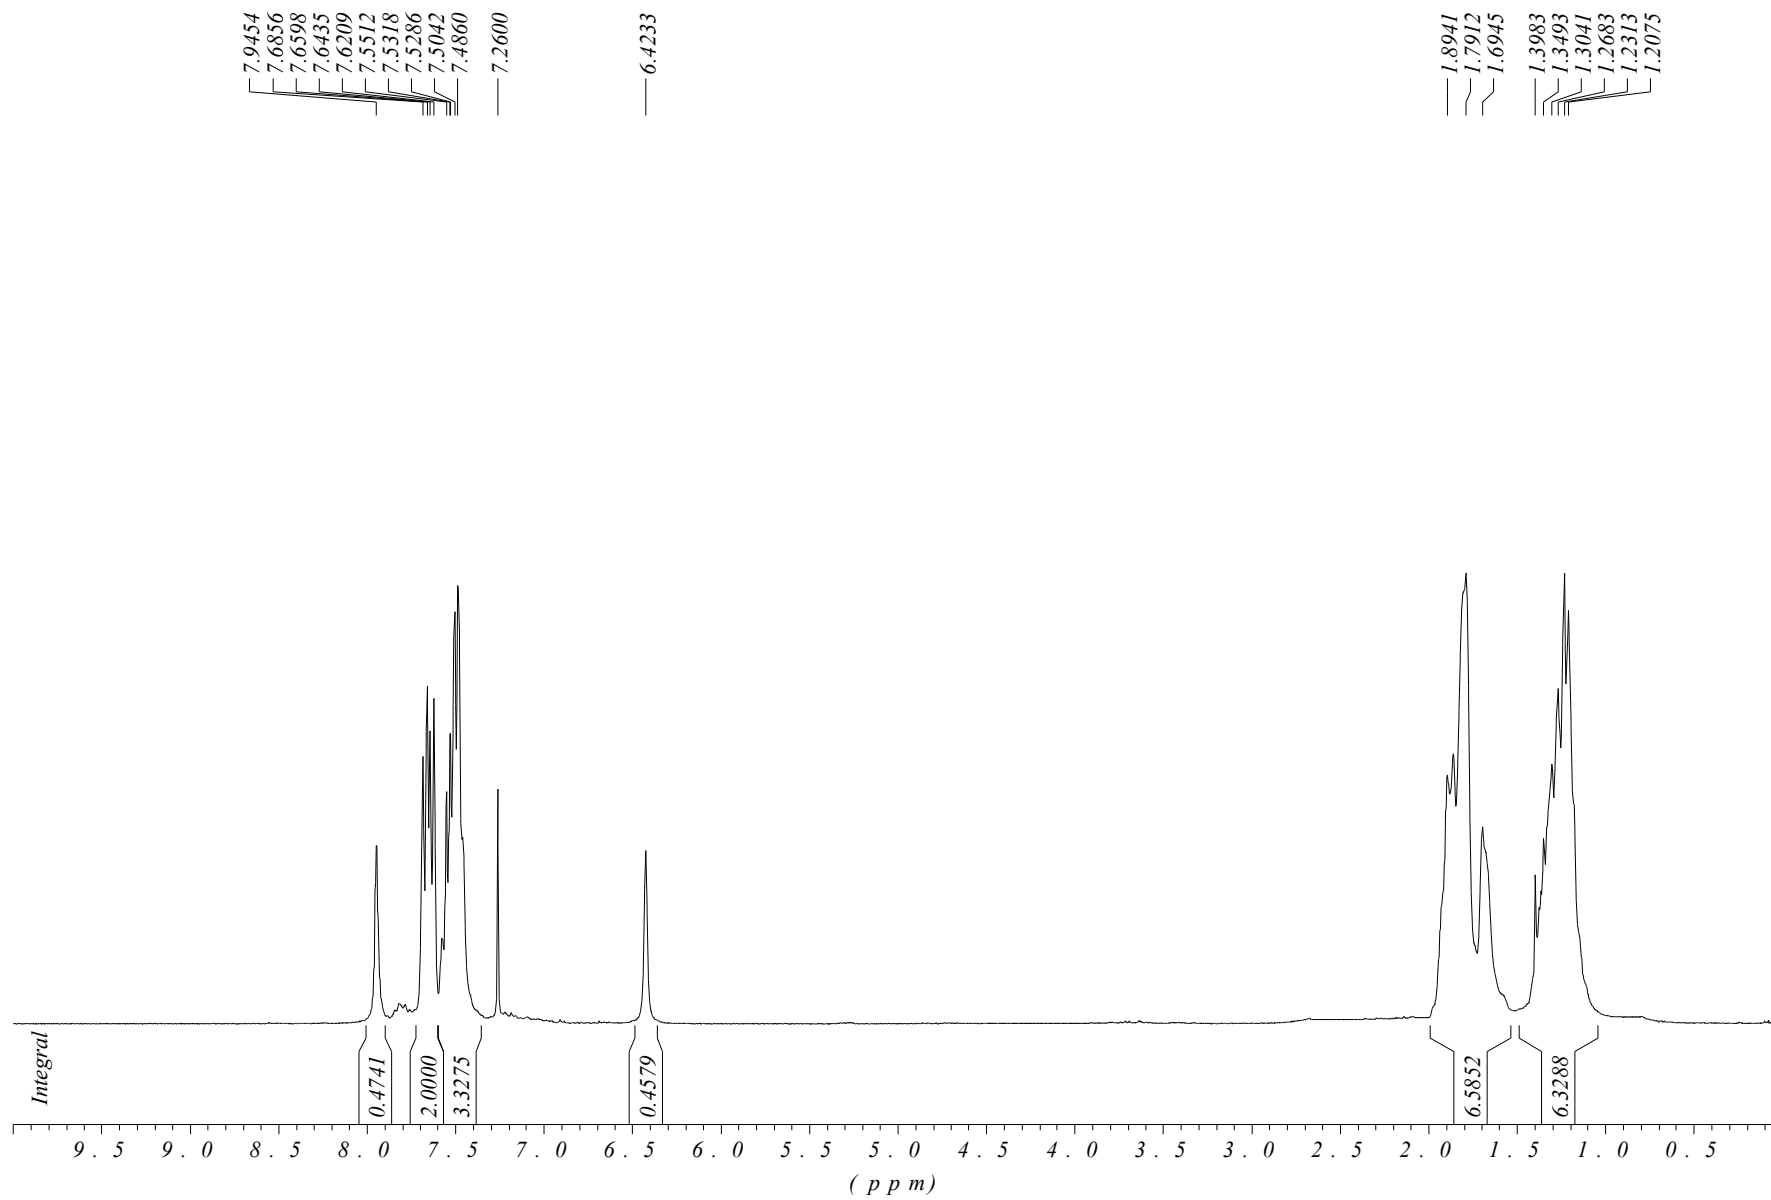

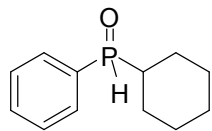

Supplementary Material (ESI) for Green Chemistry  
This journal is © The Royal Society of Chemistry 2010

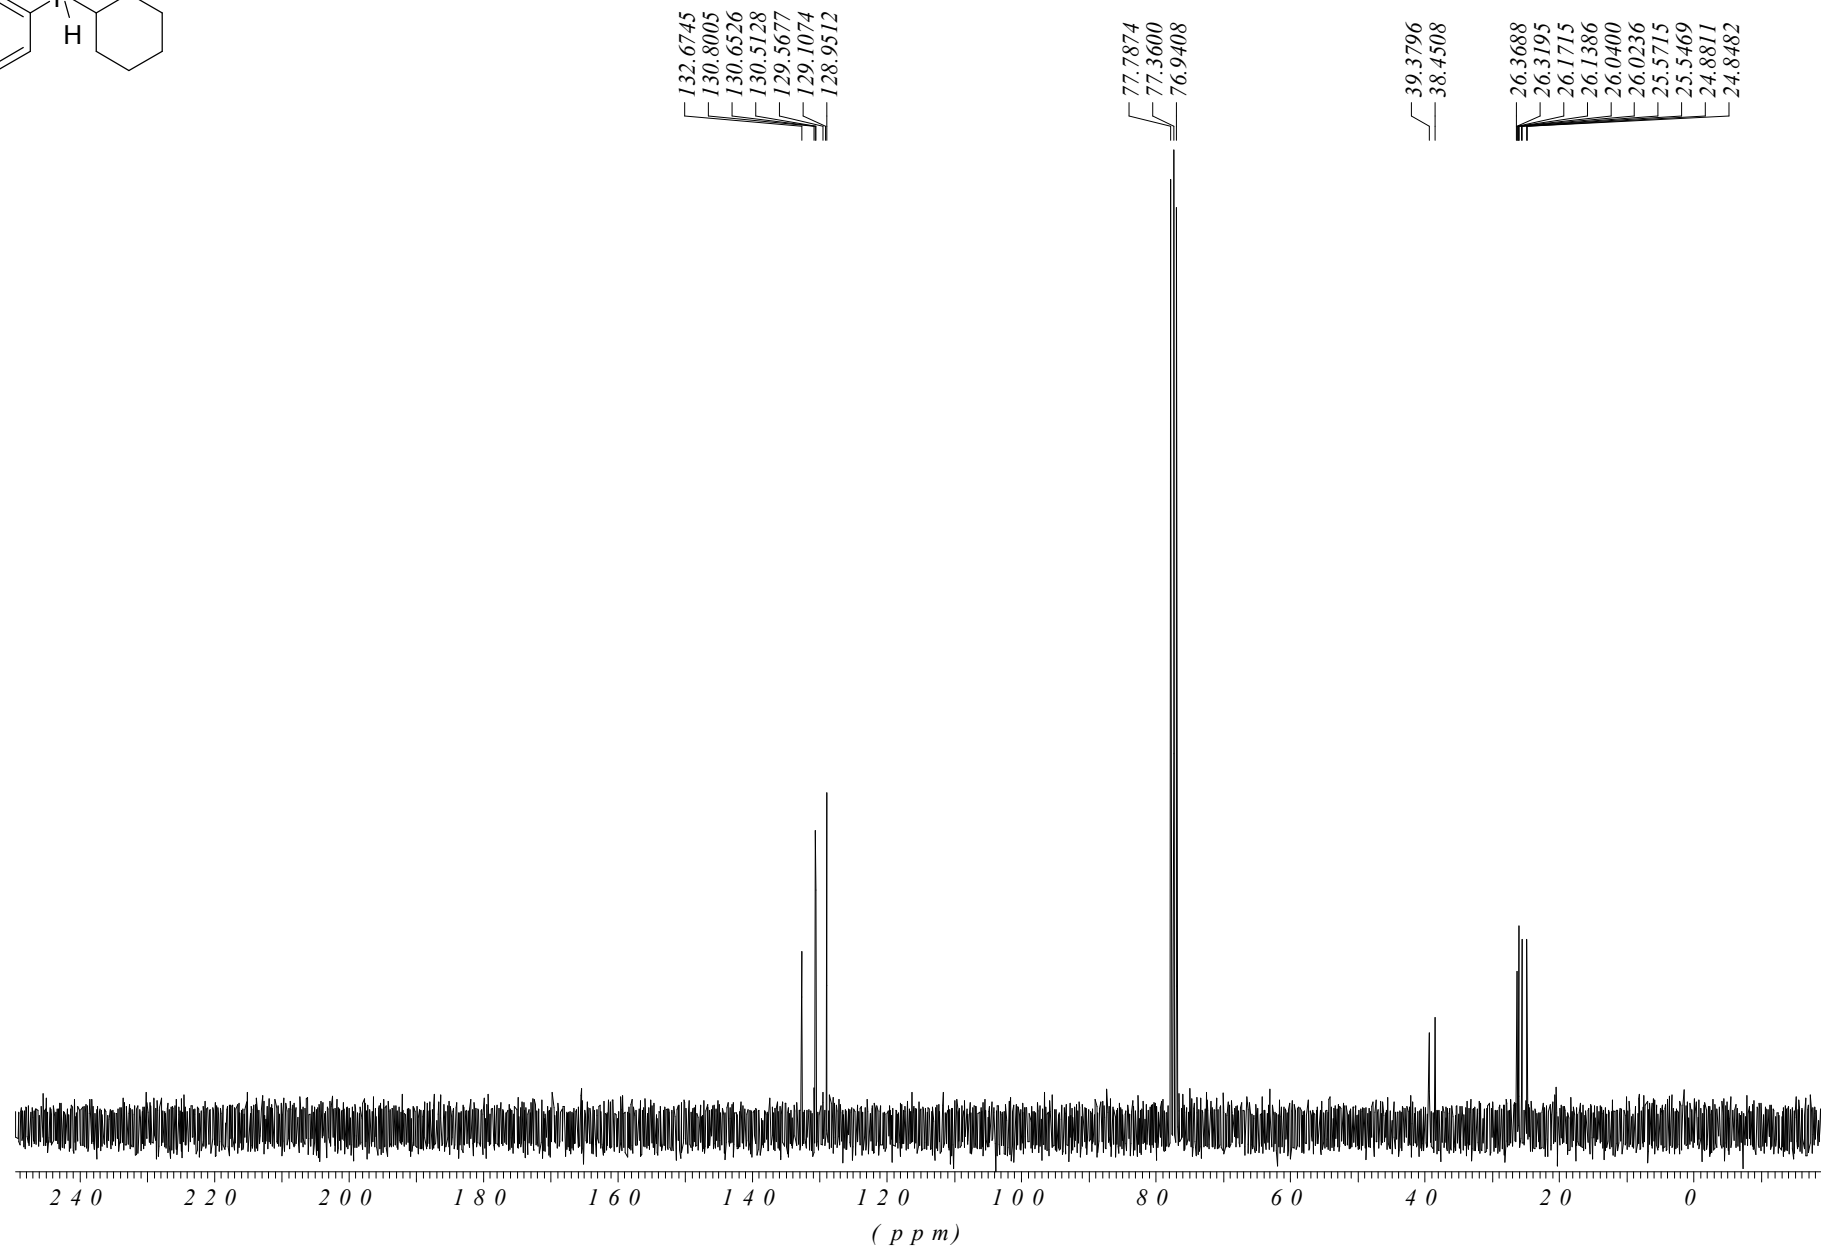

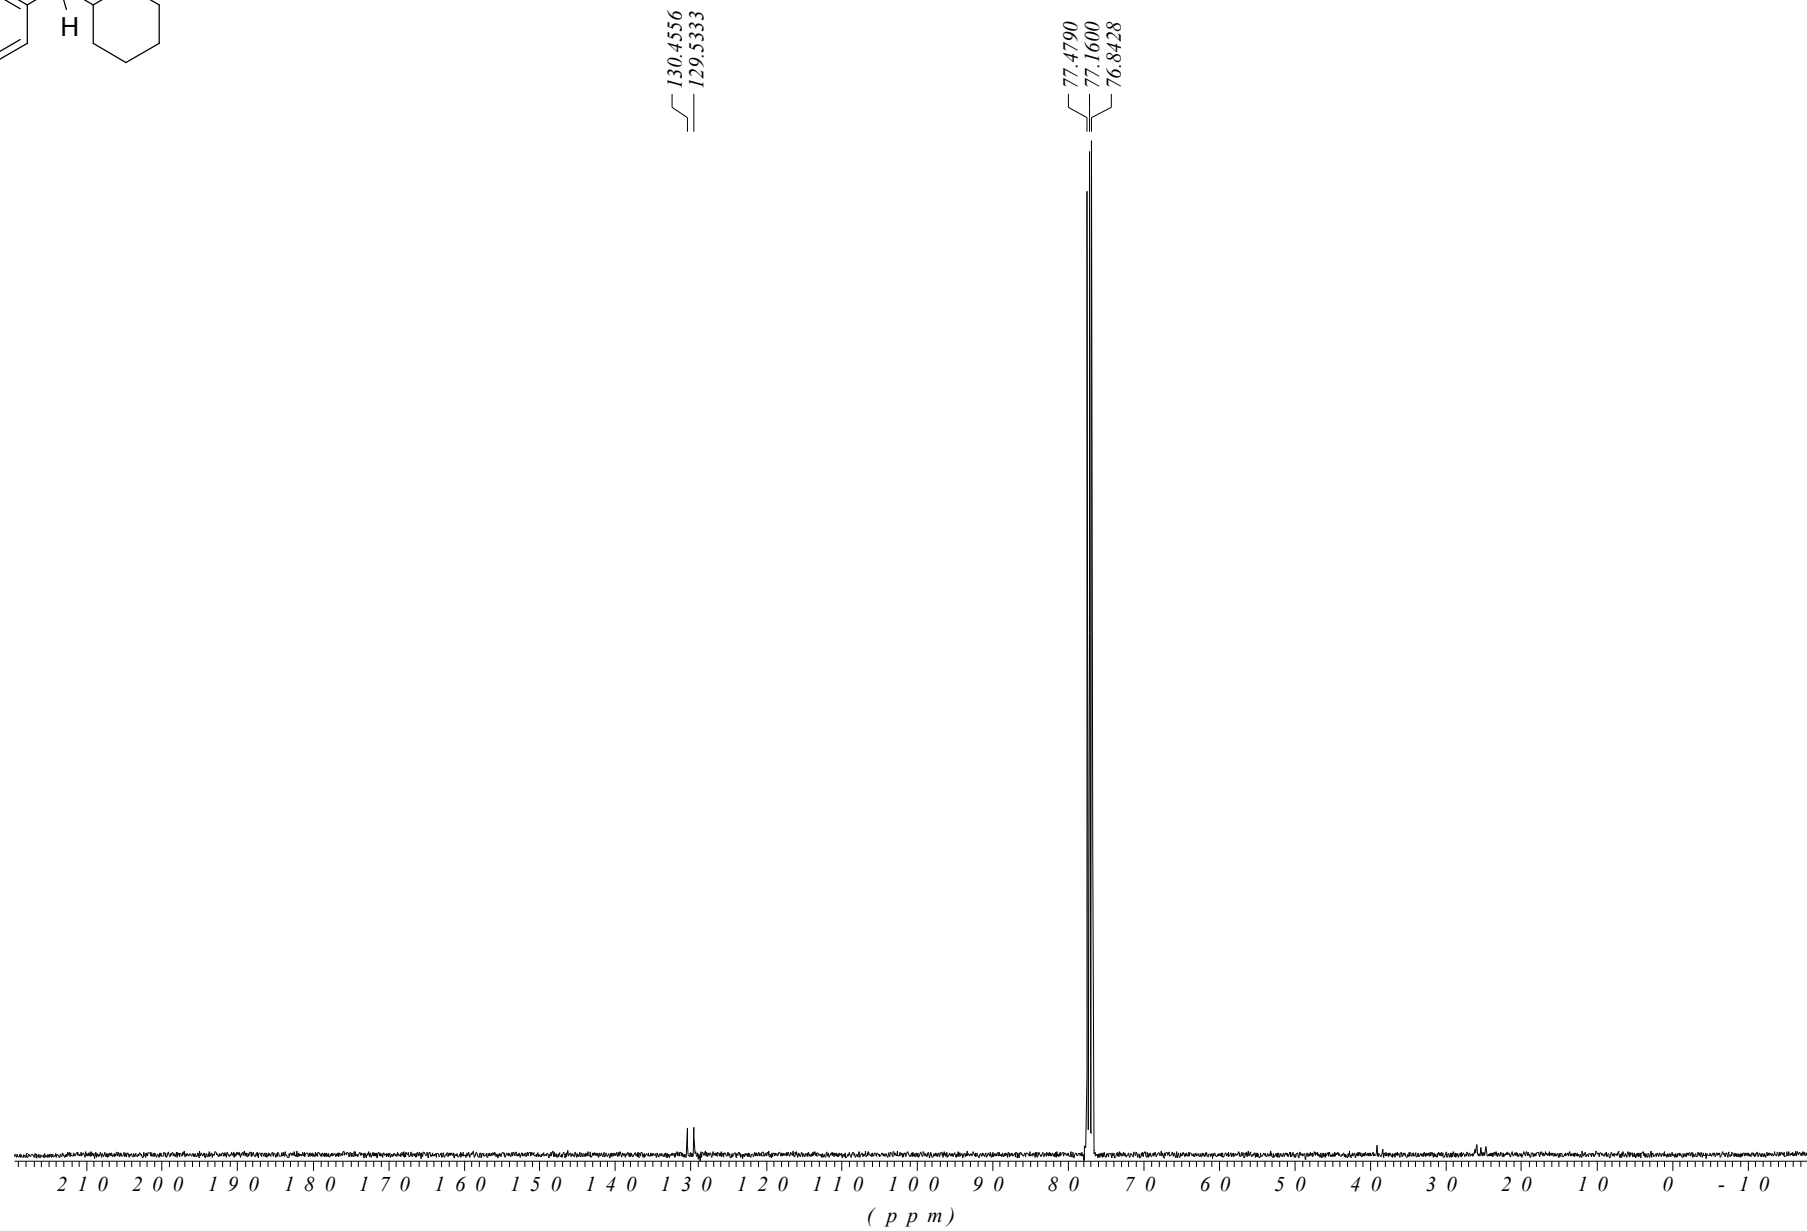

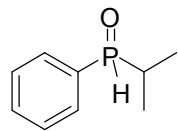

Supplementary Material (ESI) for Green Chemistry  
This journal is © The Royal Society of Chemistry 2010

— 41.3836

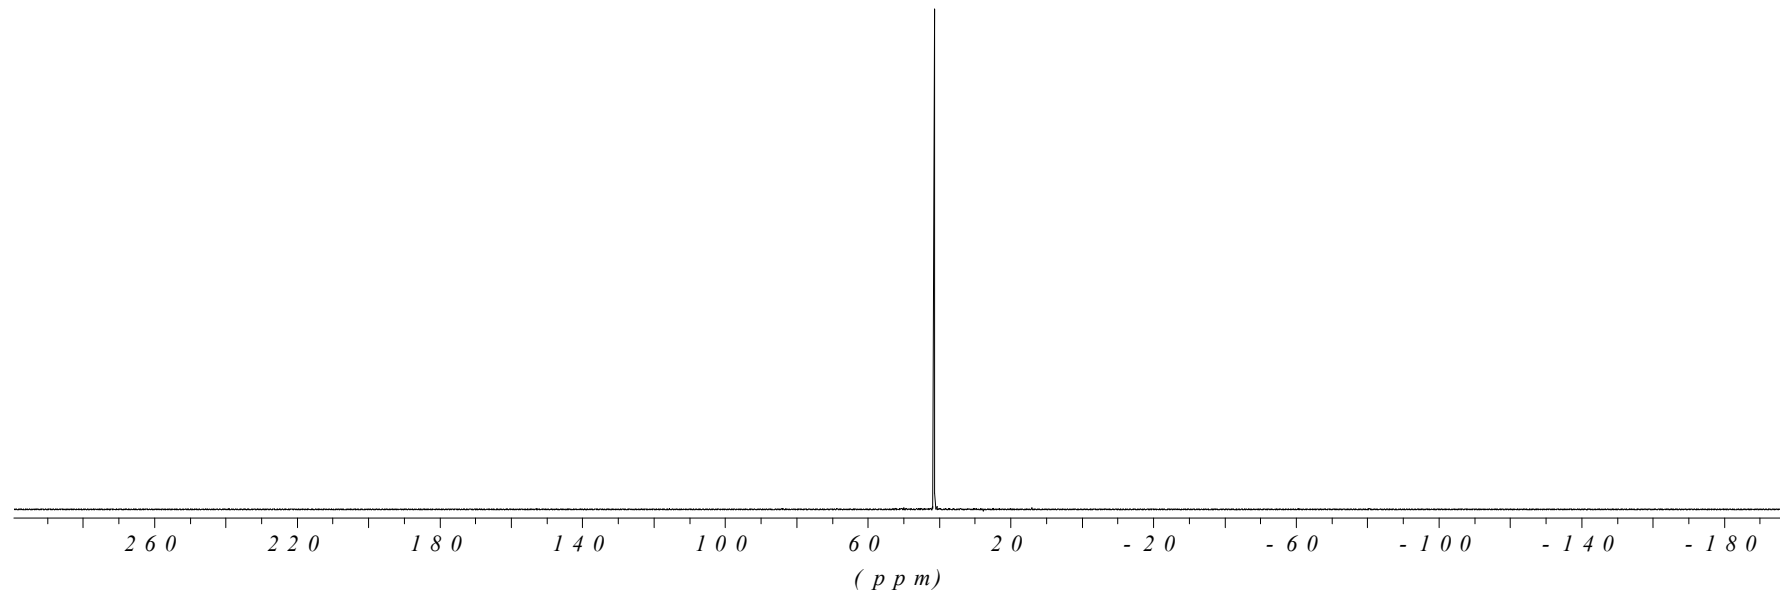

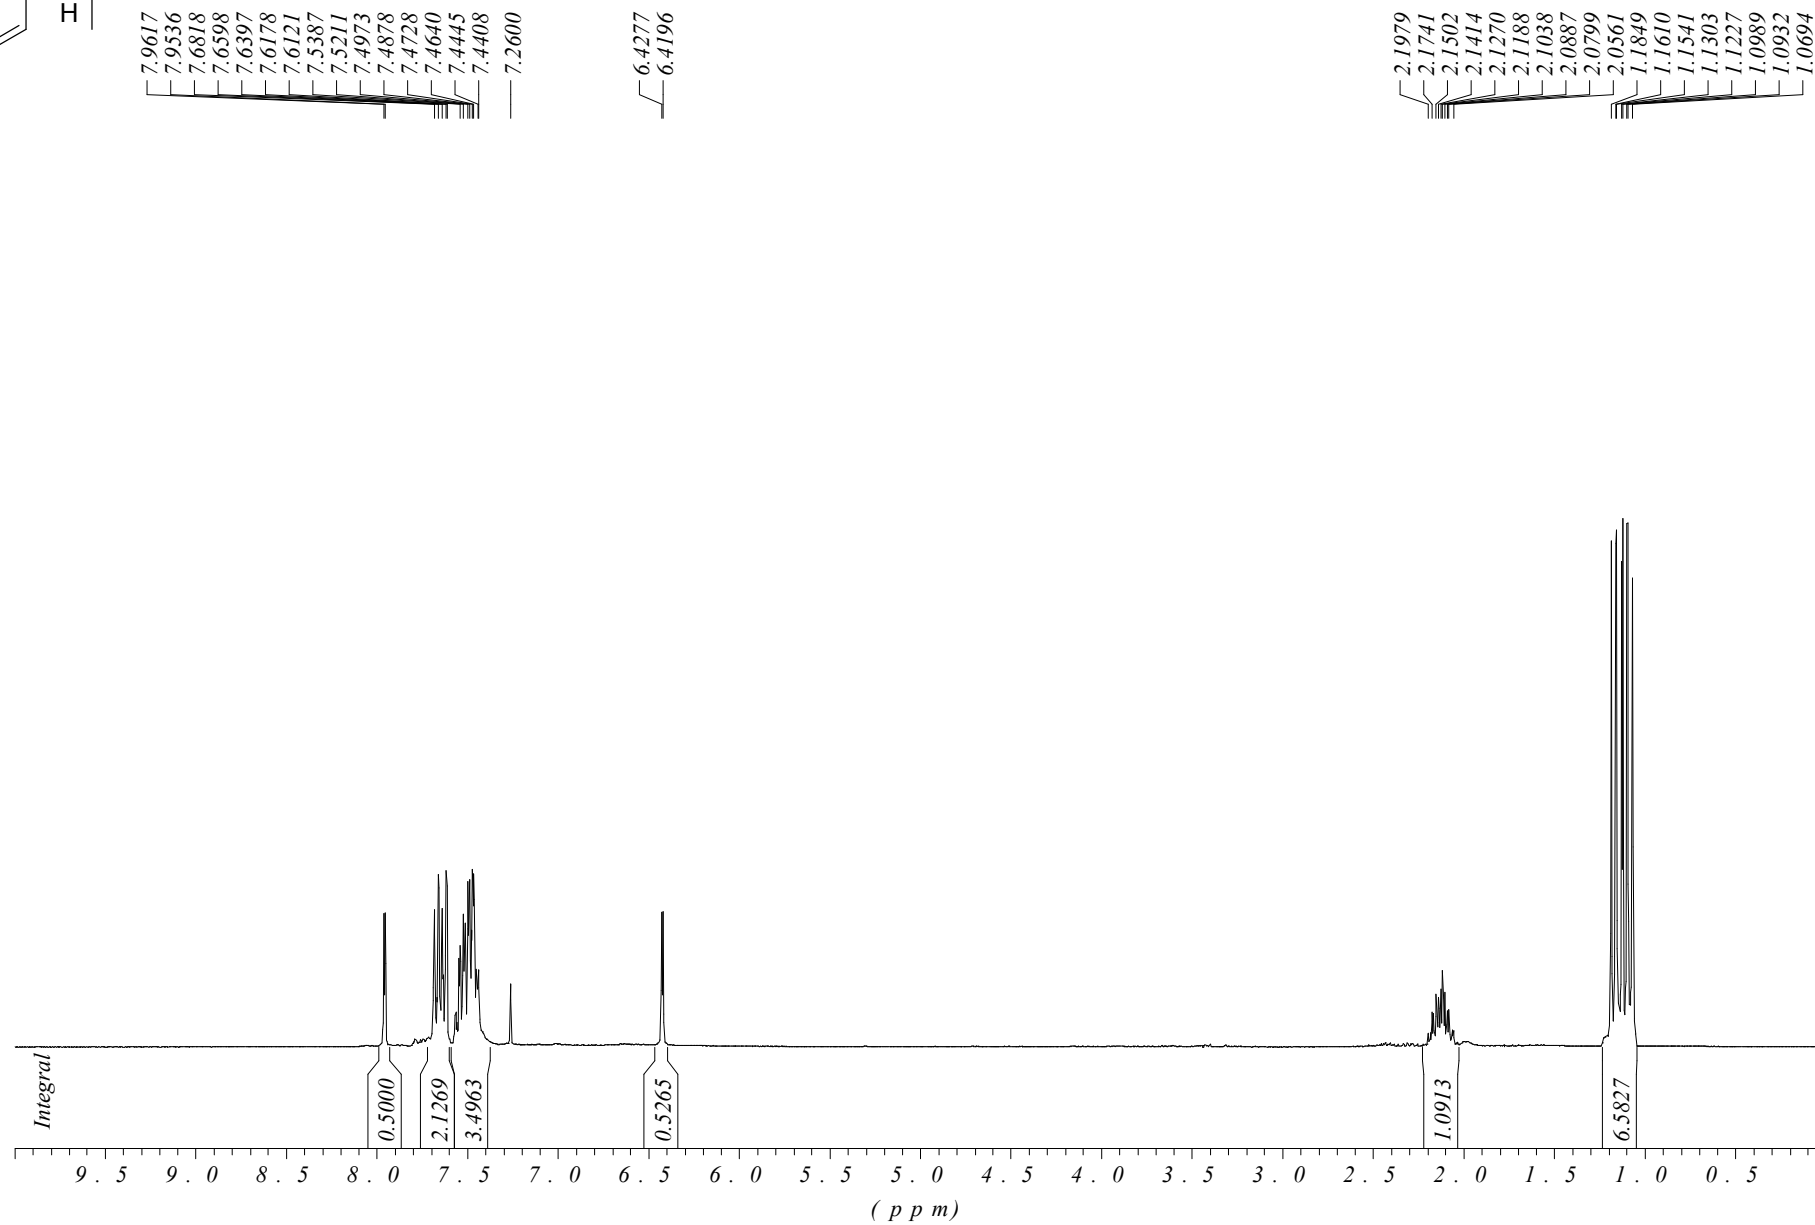

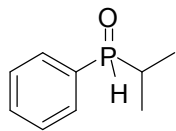

Supplementary Material (ESI) for Green Chemistry  
This journal is © The Royal Society of Chemistry 2010

132.8060  
132.7649  
130.6690  
130.5375  
130.1265  
129.1156  
128.9512  
128.8937

77.7874  
77.3600  
76.9408

29.2290  
28.3167

15.3305  
15.3141  
14.8292  
14.8045

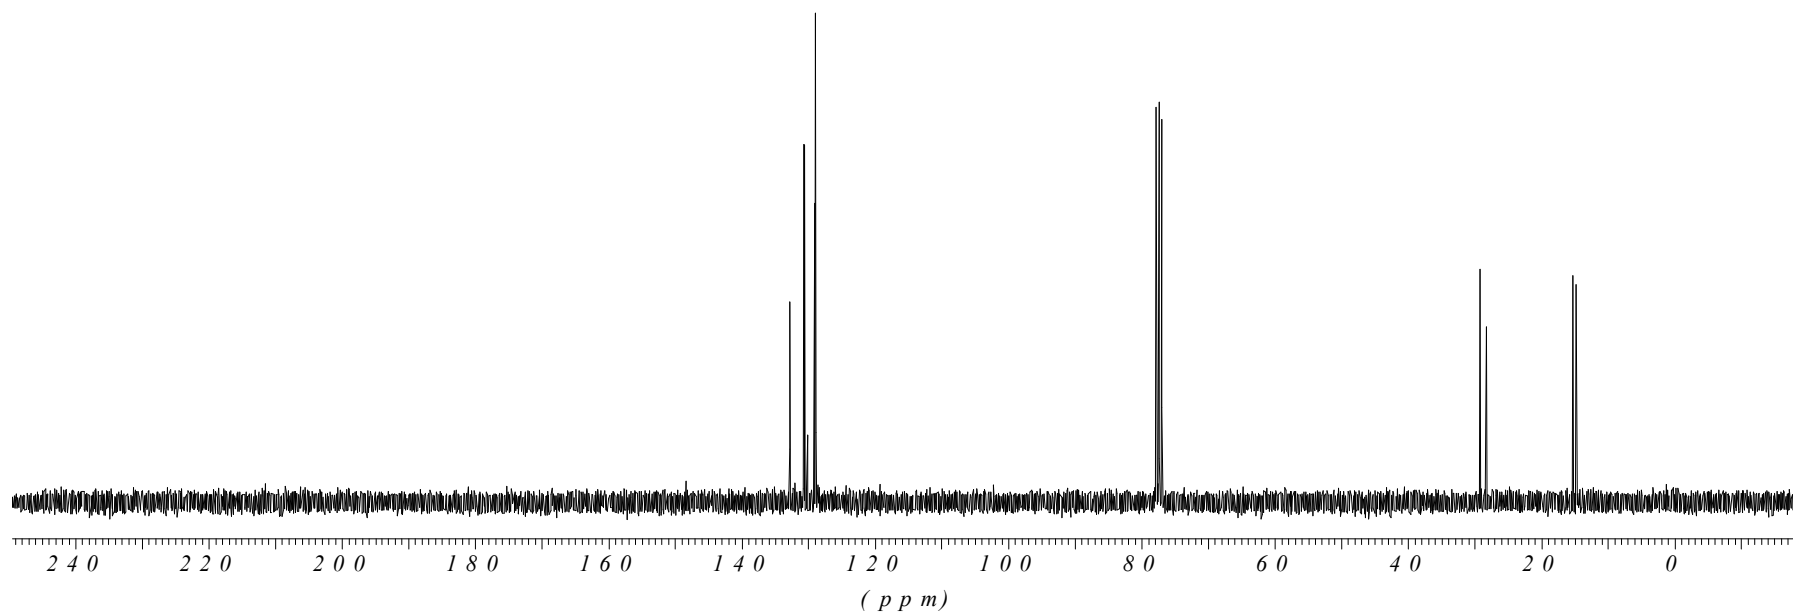



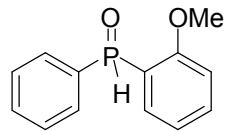

Supplementary Material (ESI) for Green Chemistry  
This journal is © The Royal Society of Chemistry 2010

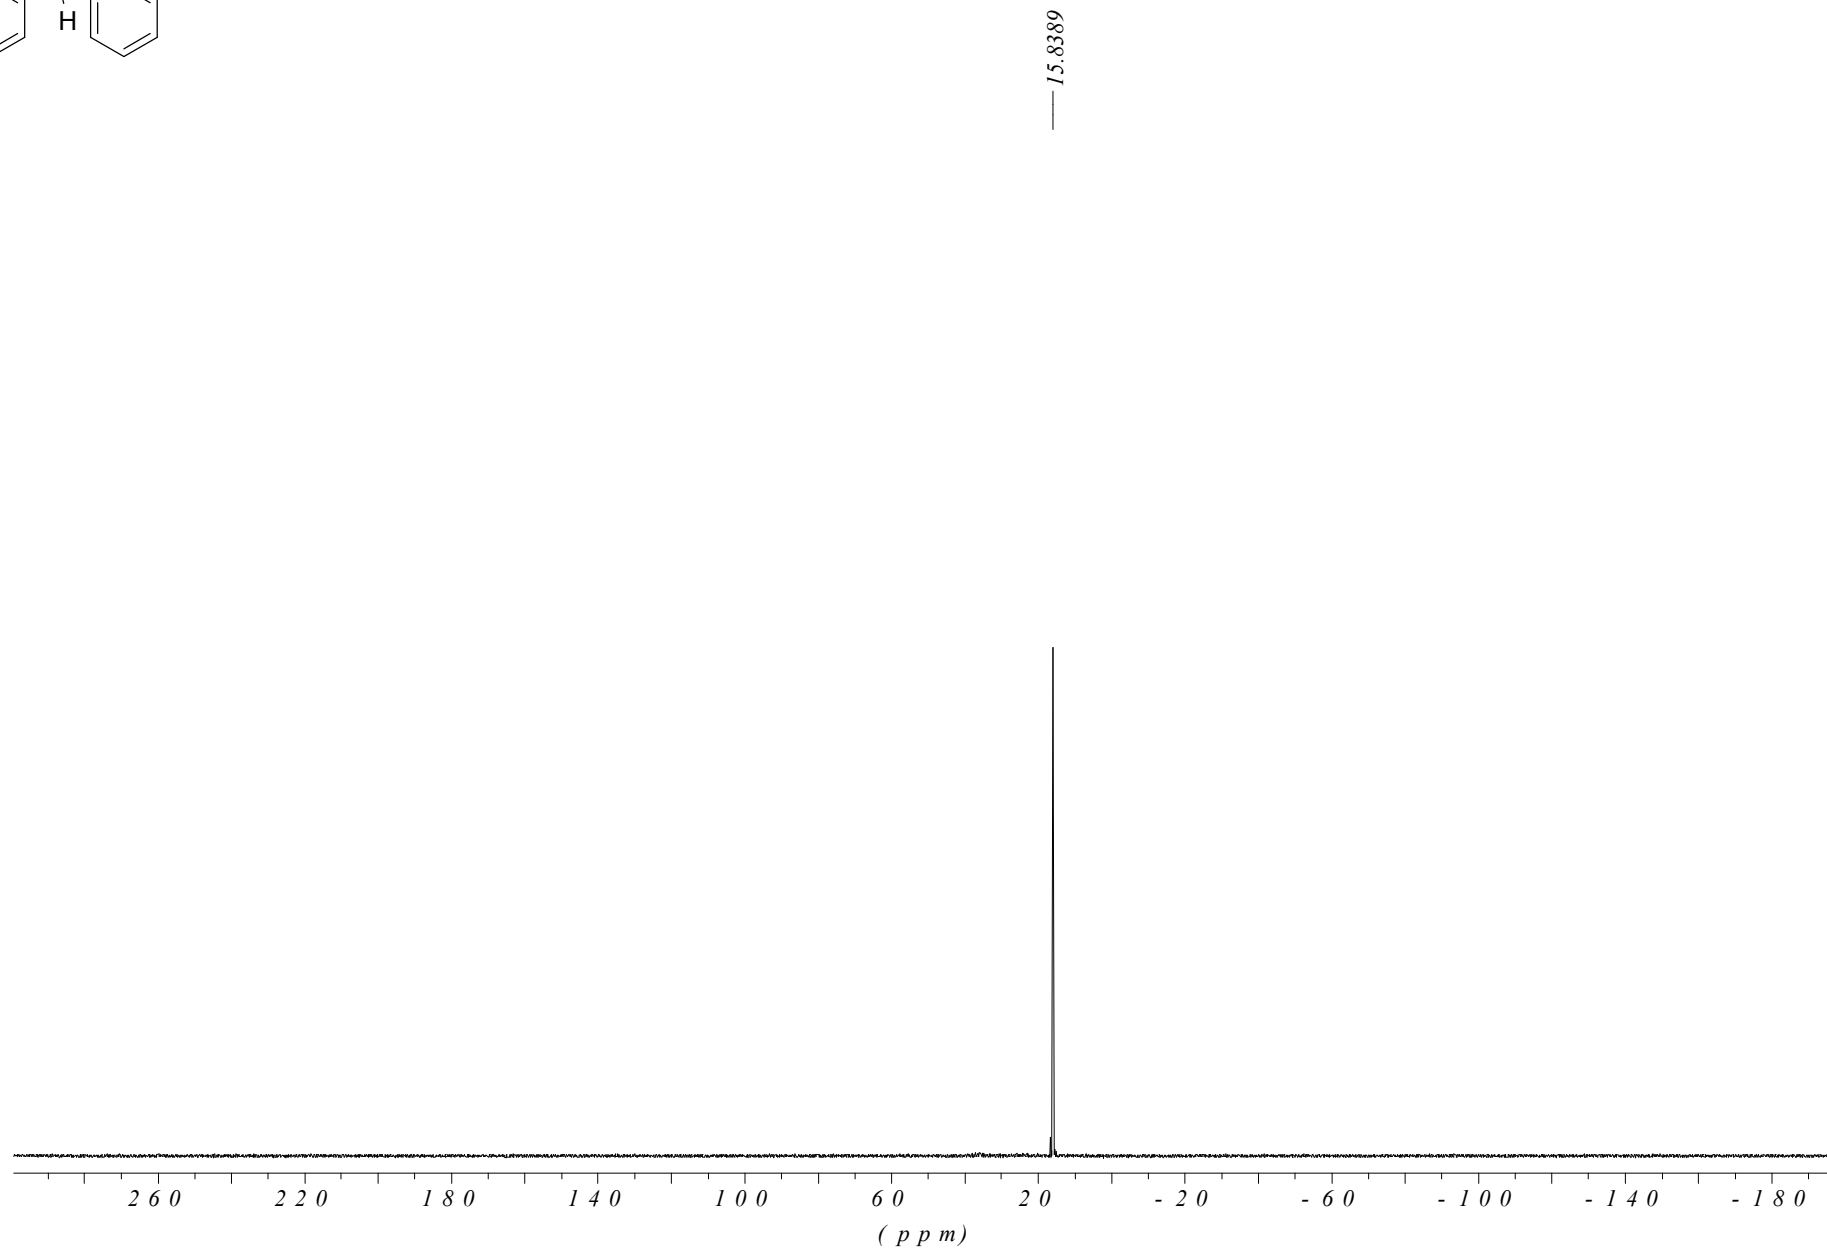

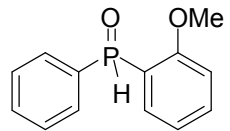

Supplementary Material (ESI) for Green Chemistry  
This journal is © The Royal Society of Chemistry 2010

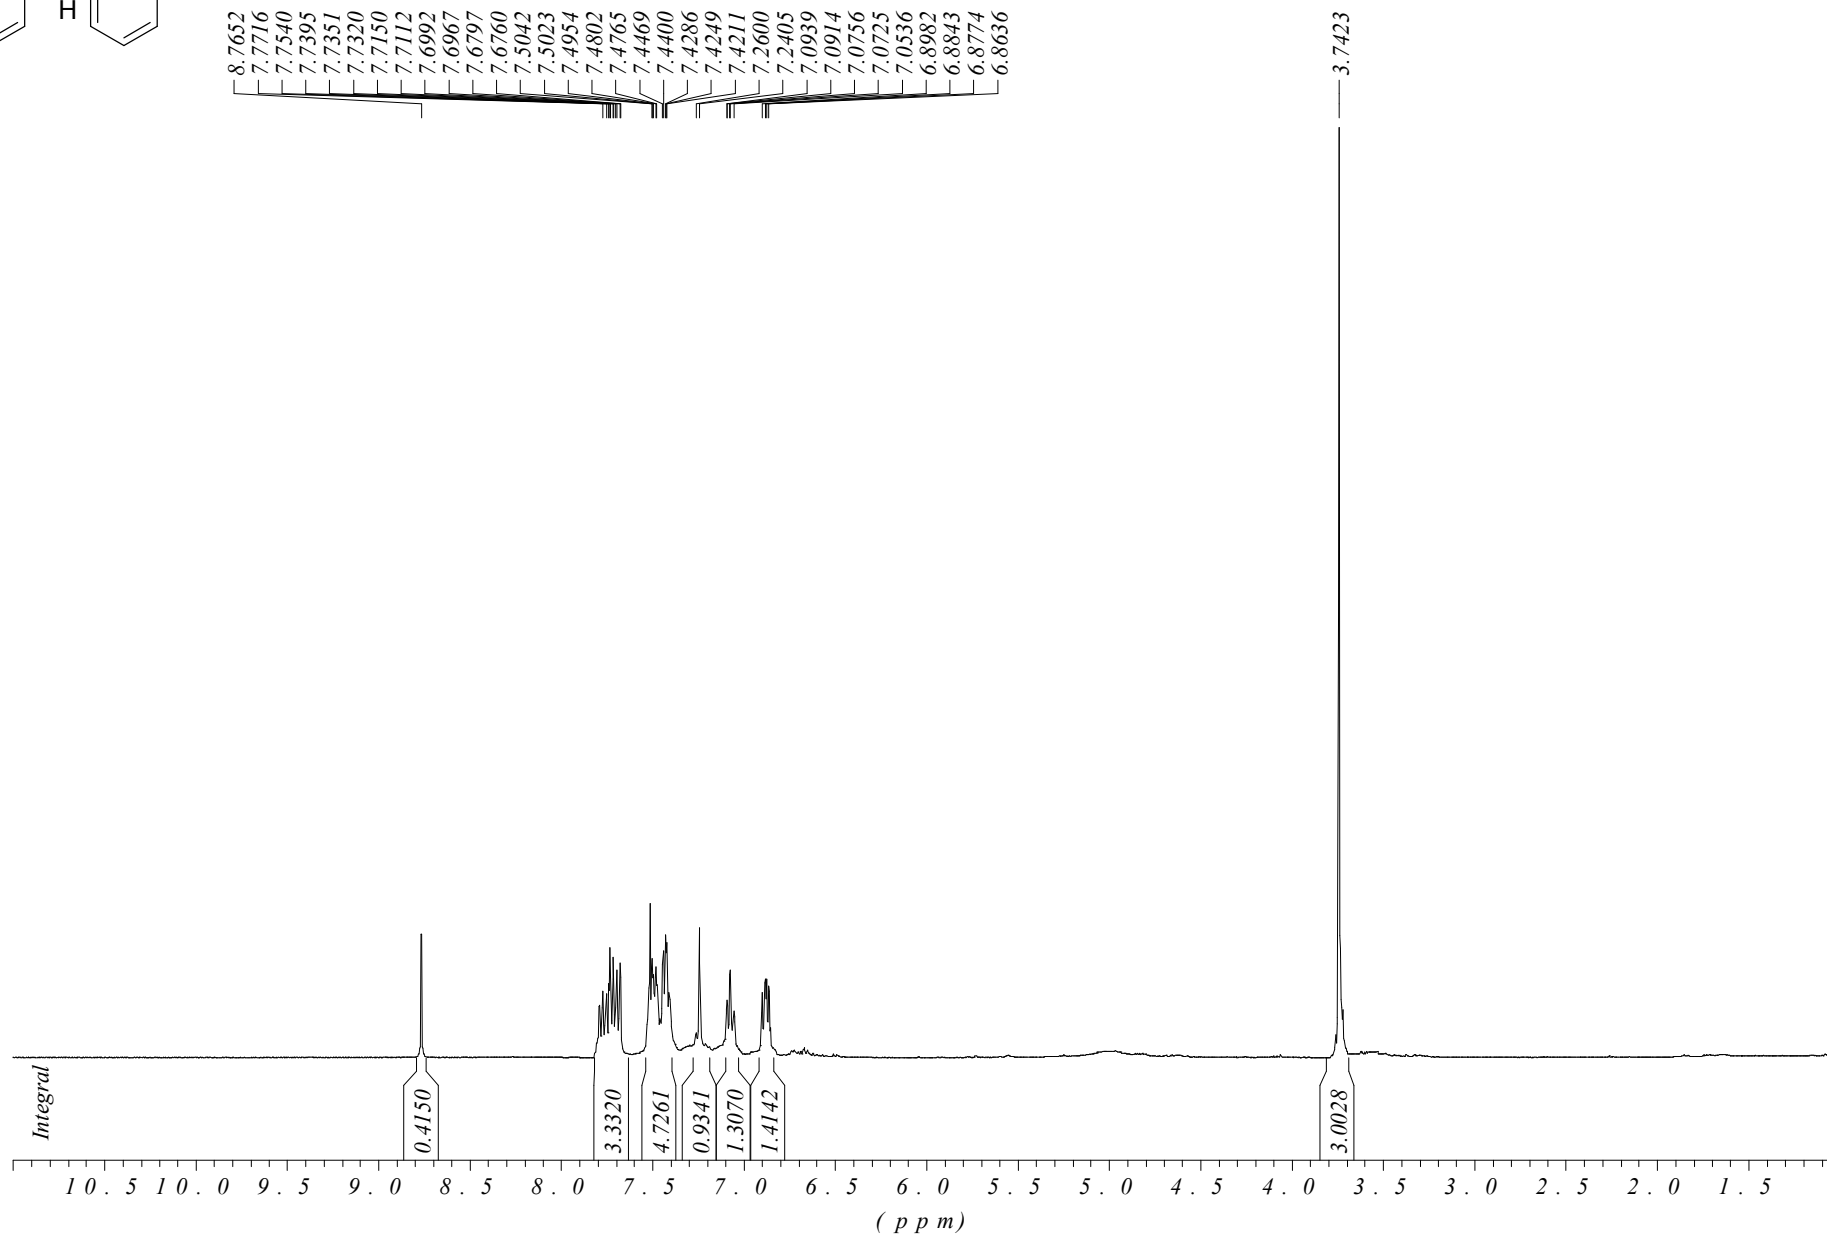

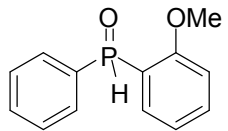

Supplementary Material (ESI) for Green Chemistry  
This journal is © The Royal Society of Chemistry 2010

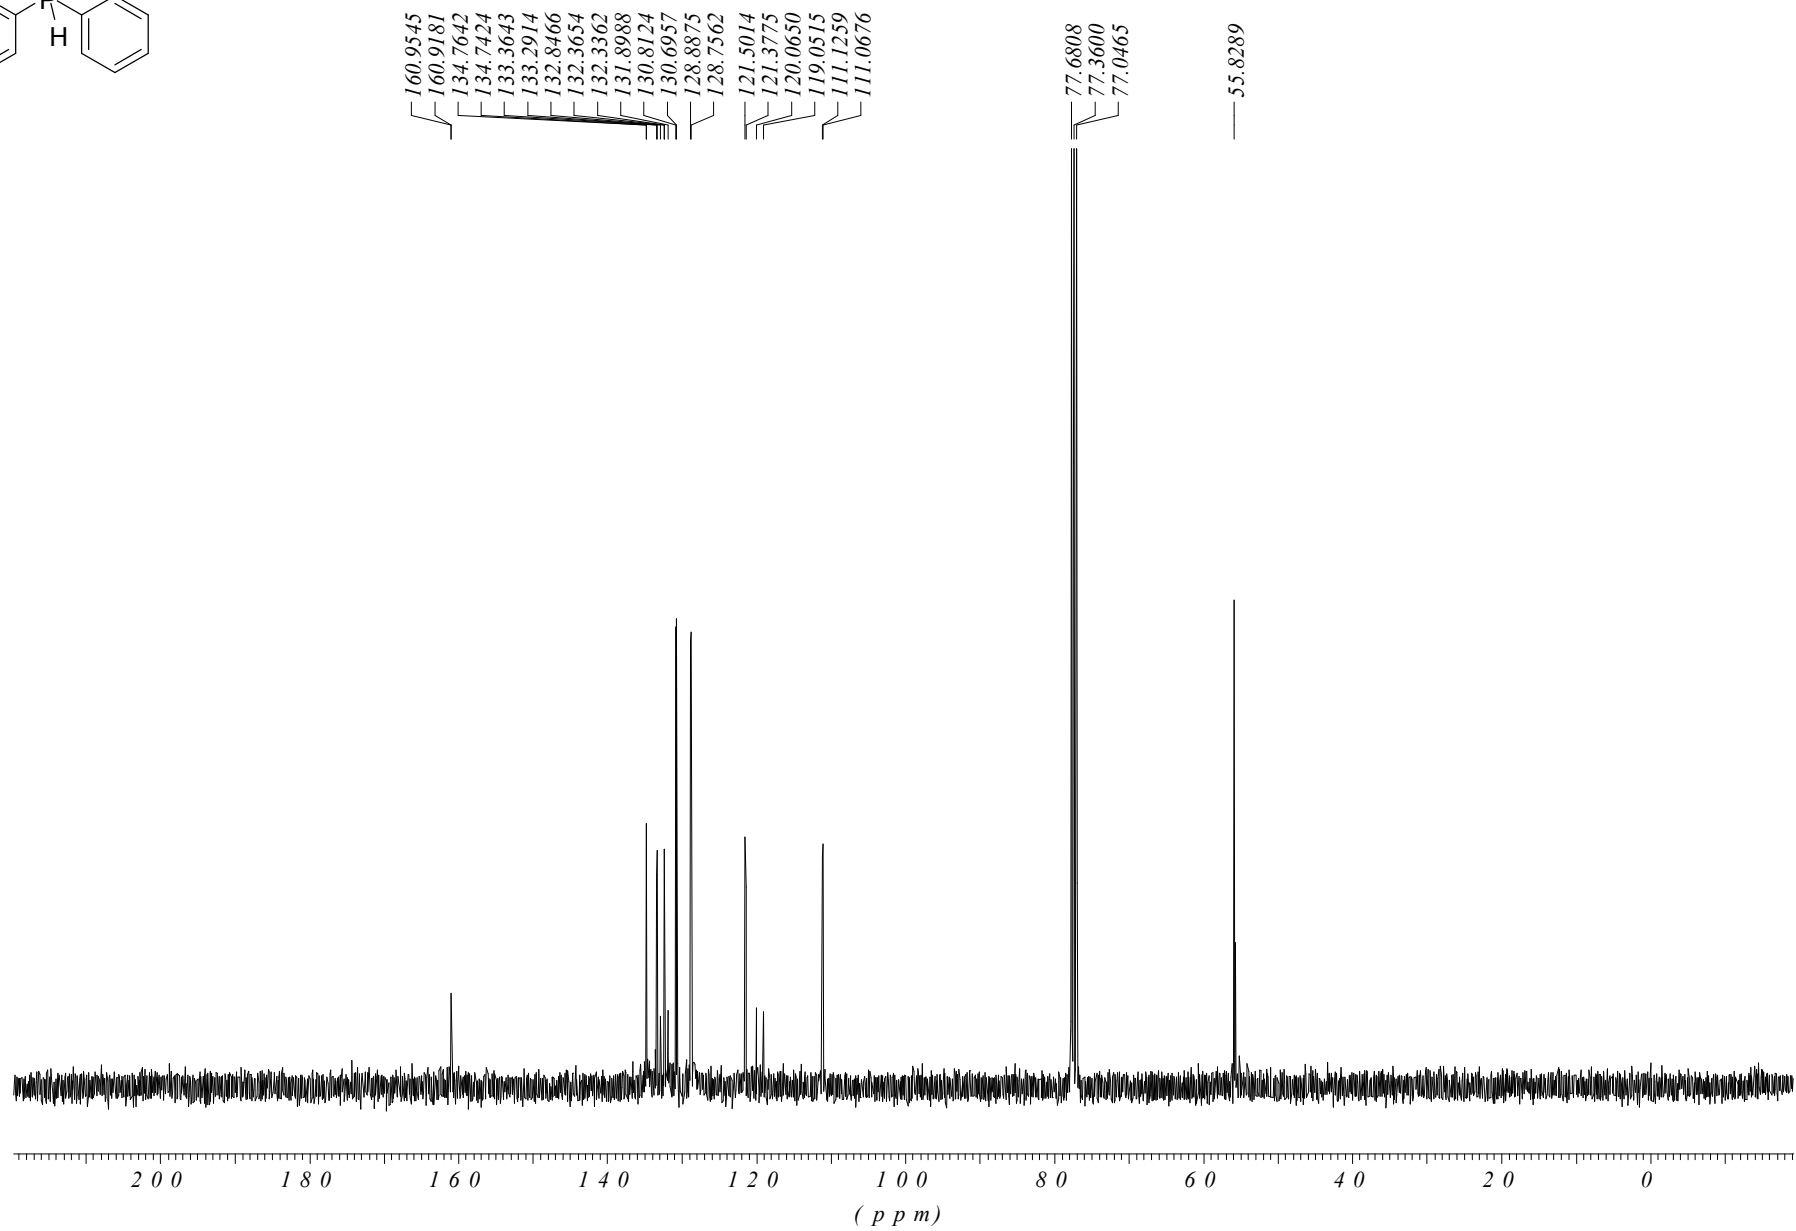

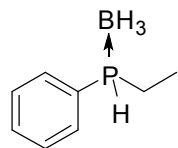

Supplementary Material (ESI) for Green Chemistry  
This journal is © The Royal Society of Chemistry 2010

2.5518  
2.1103

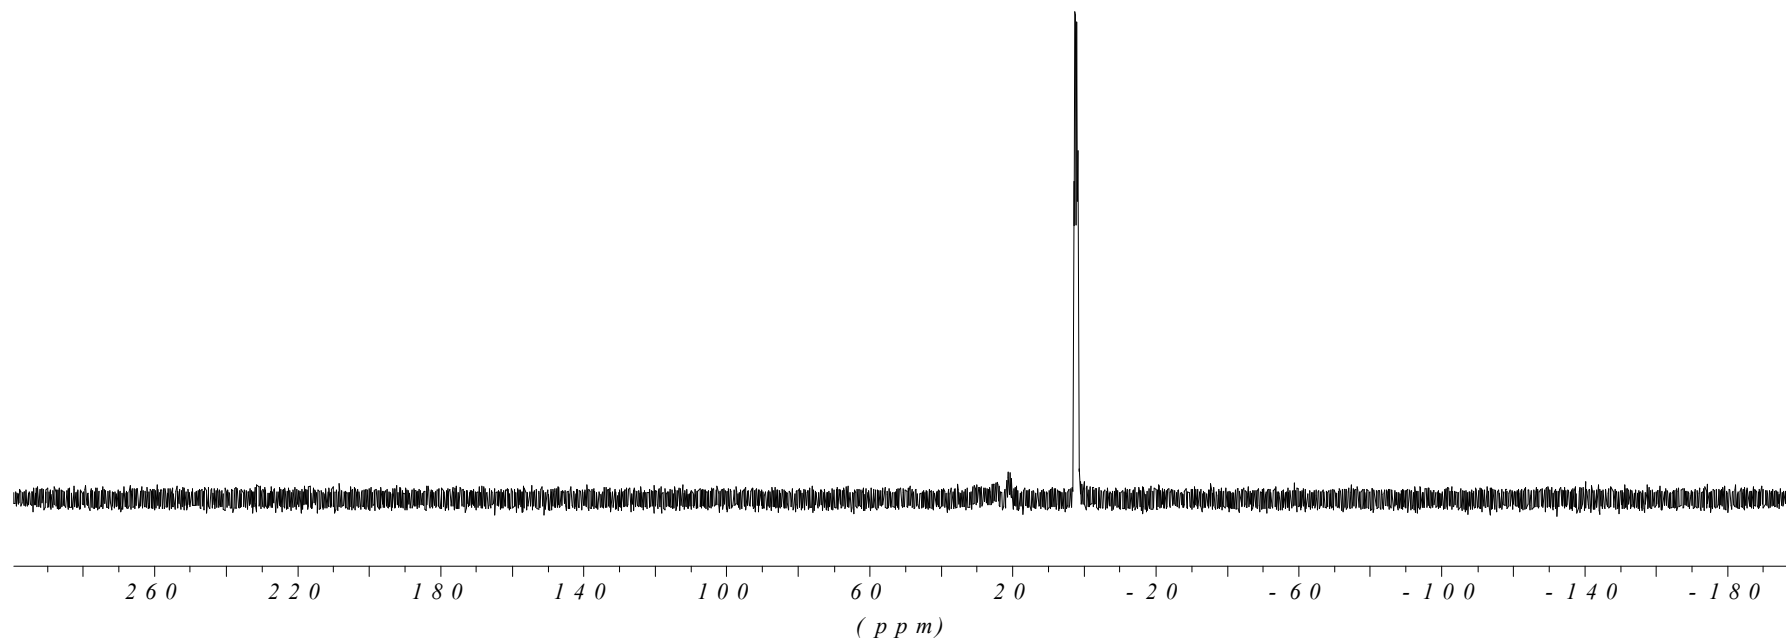

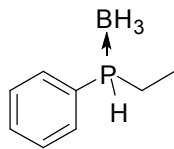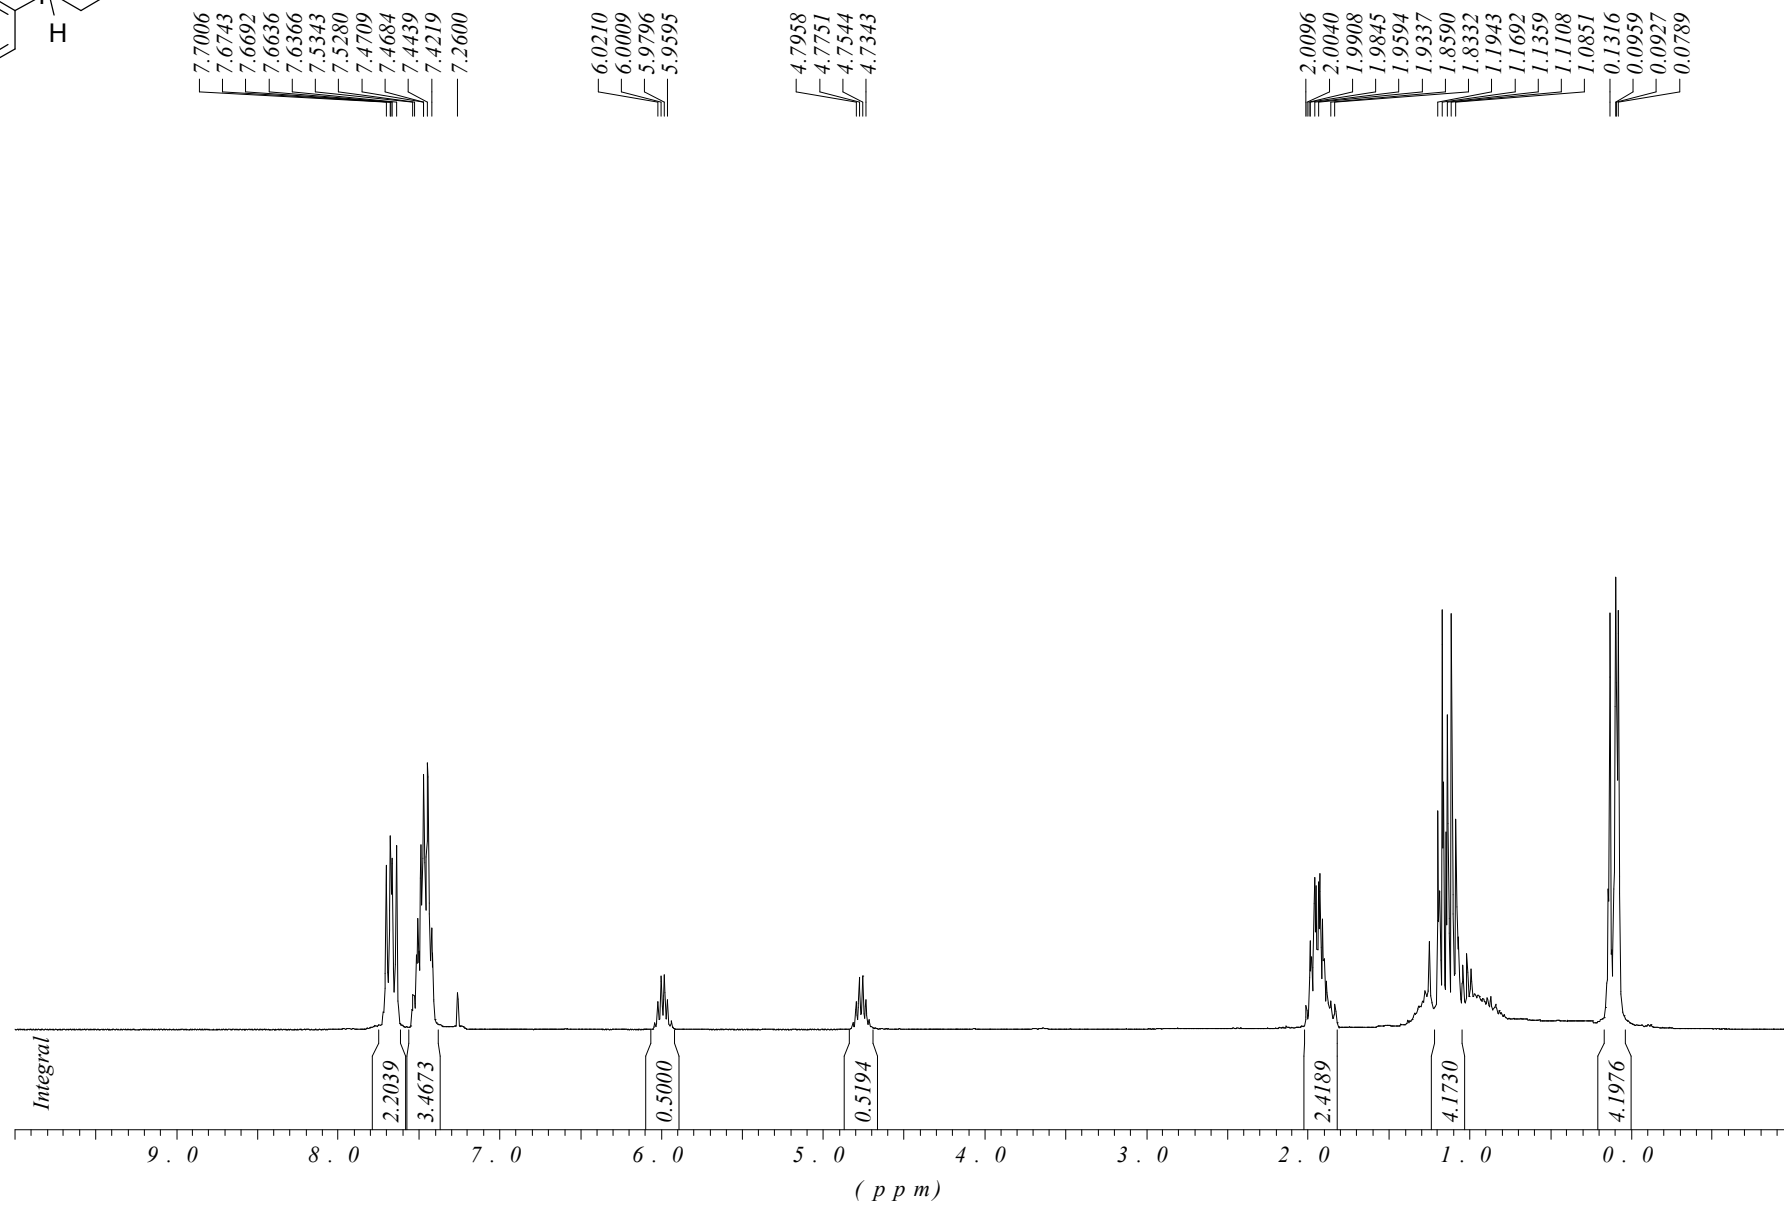

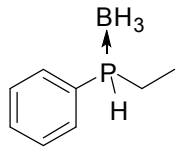

Supplementary Material (ESI) for Green Chemistry  
This journal is © The Royal Society of Chemistry 2010

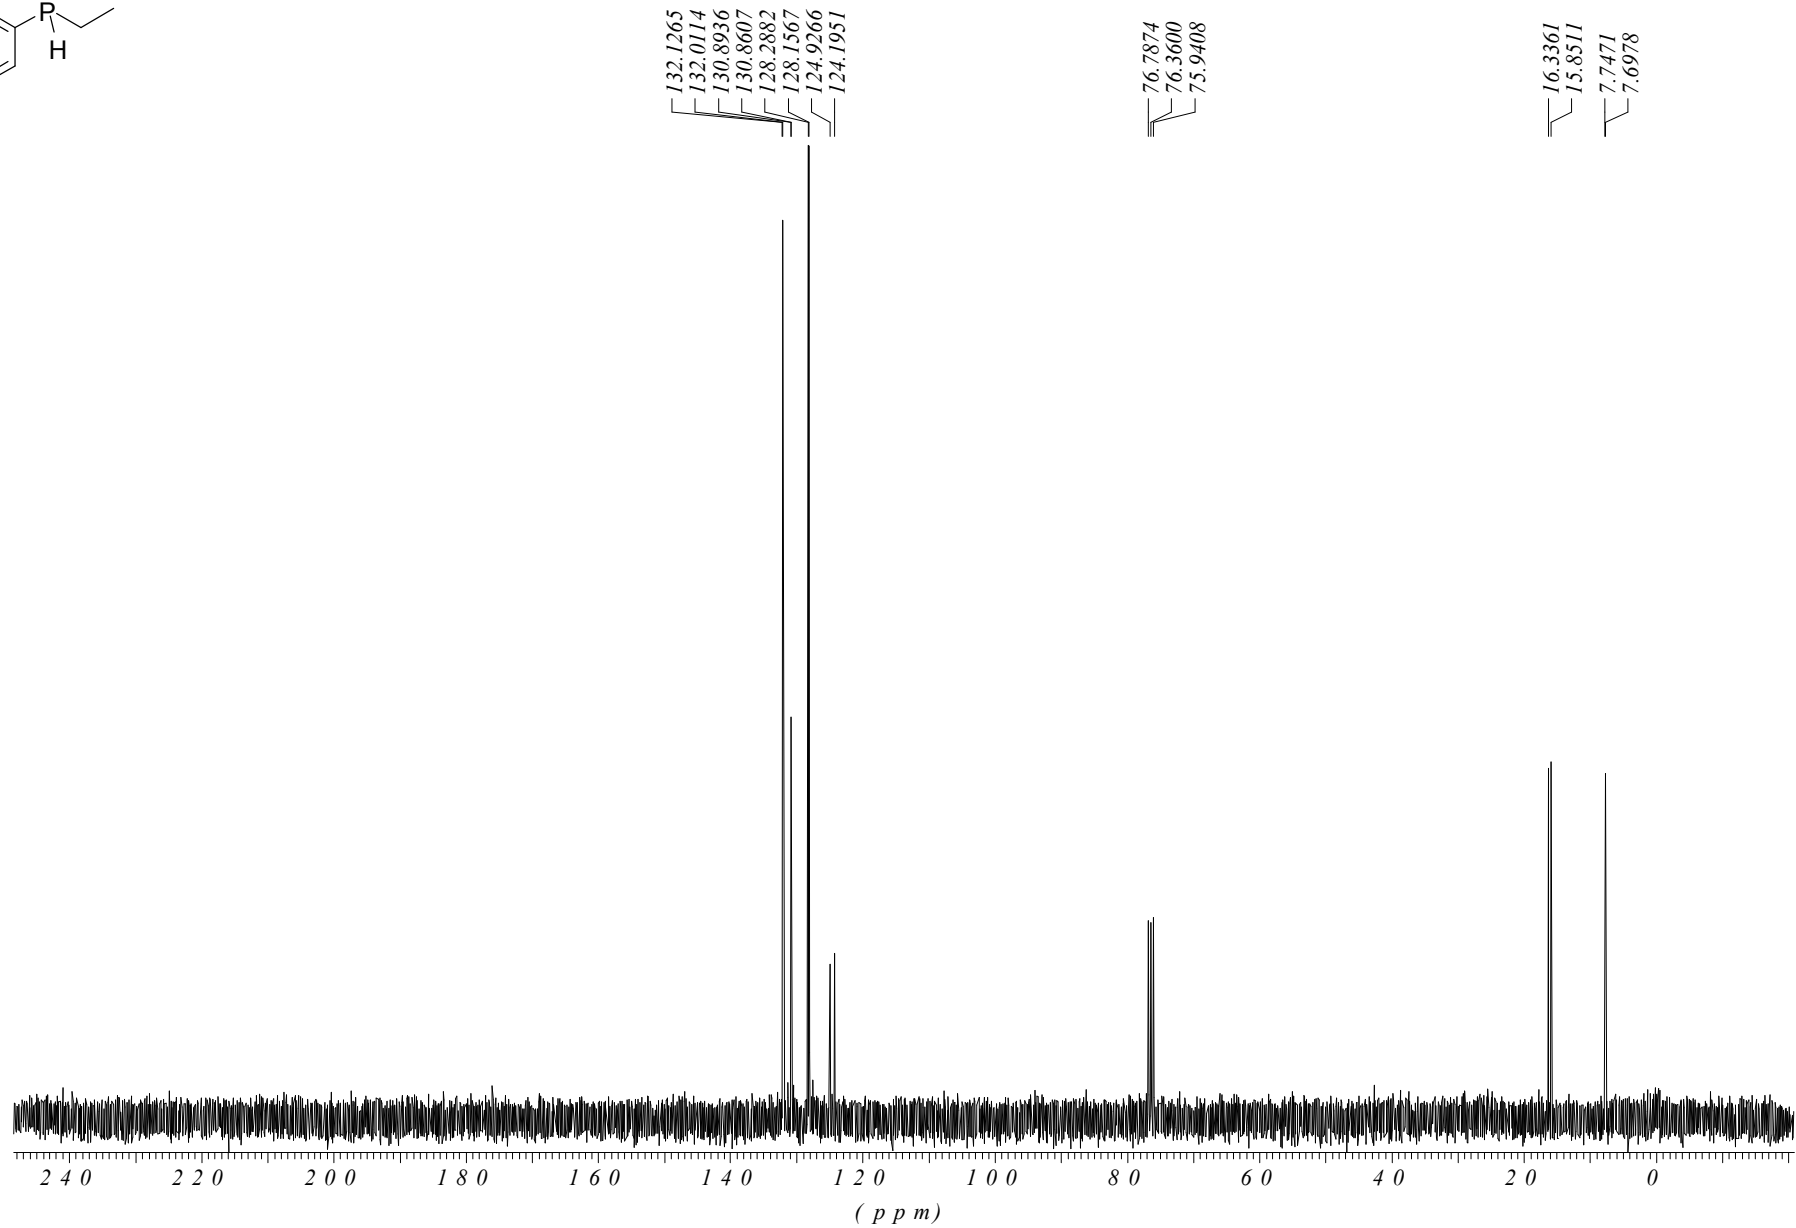

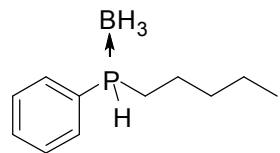

-1.6146  
-2.1246

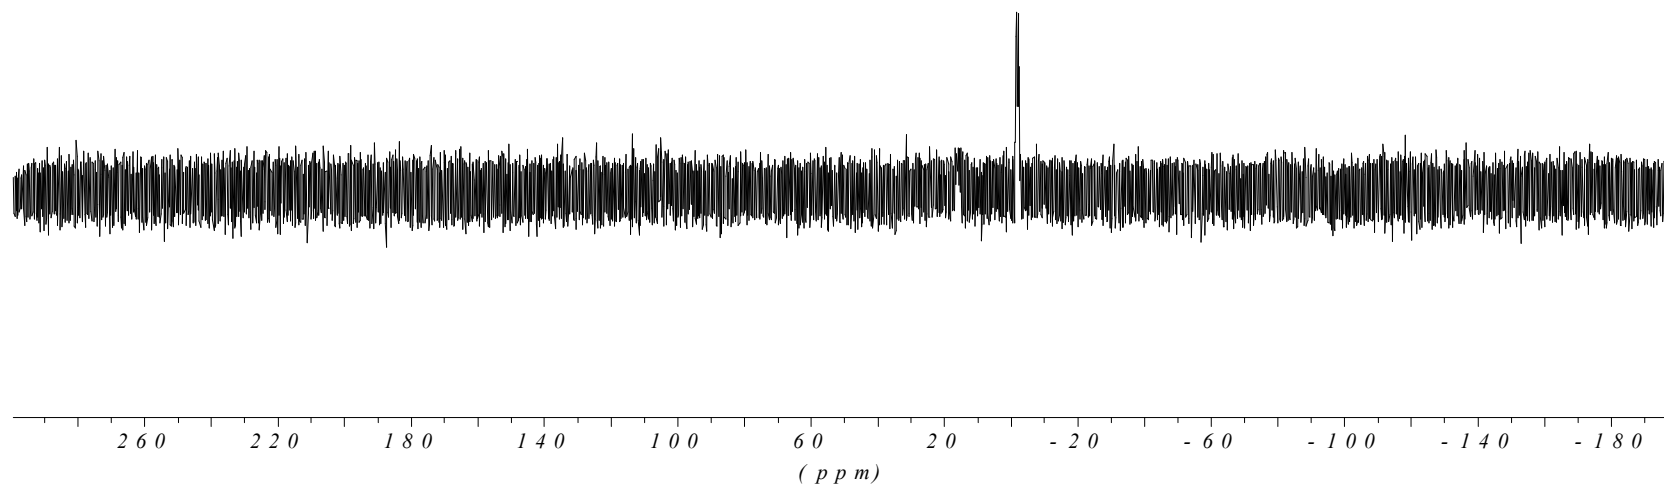

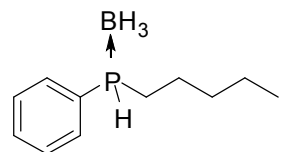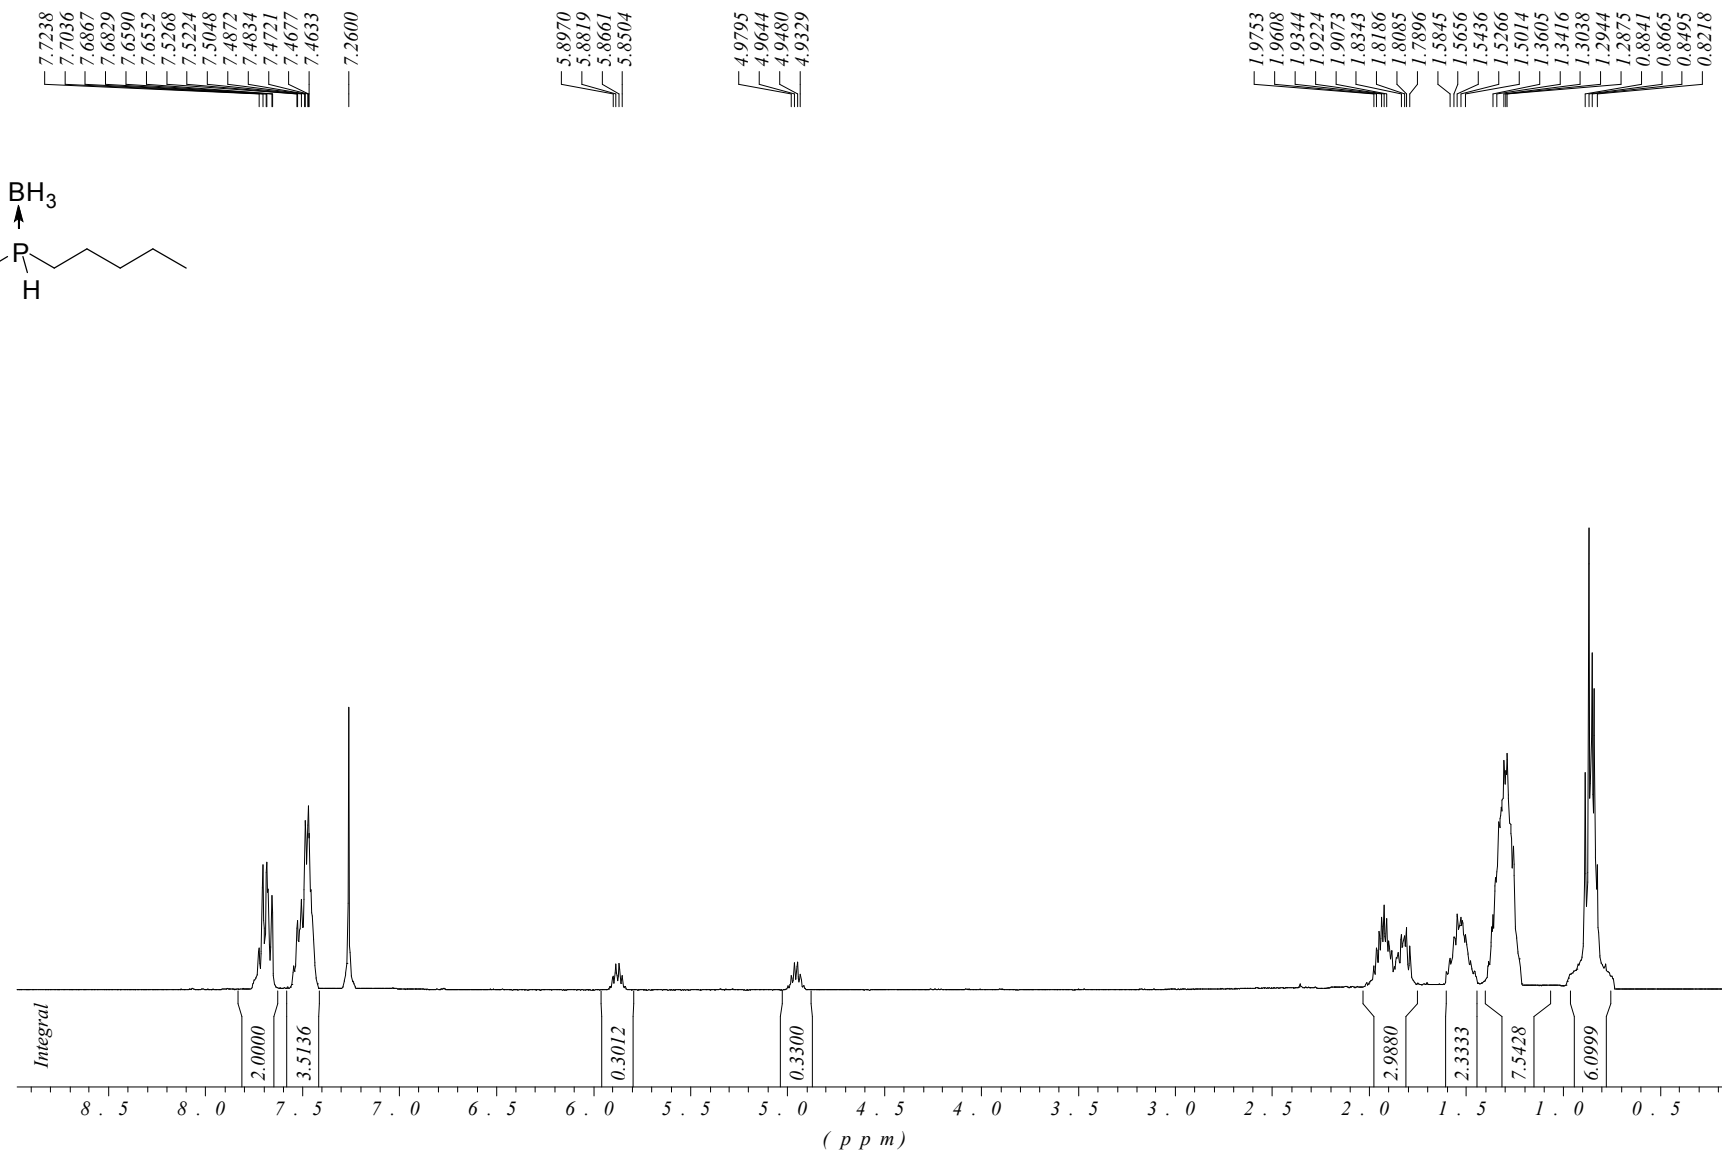



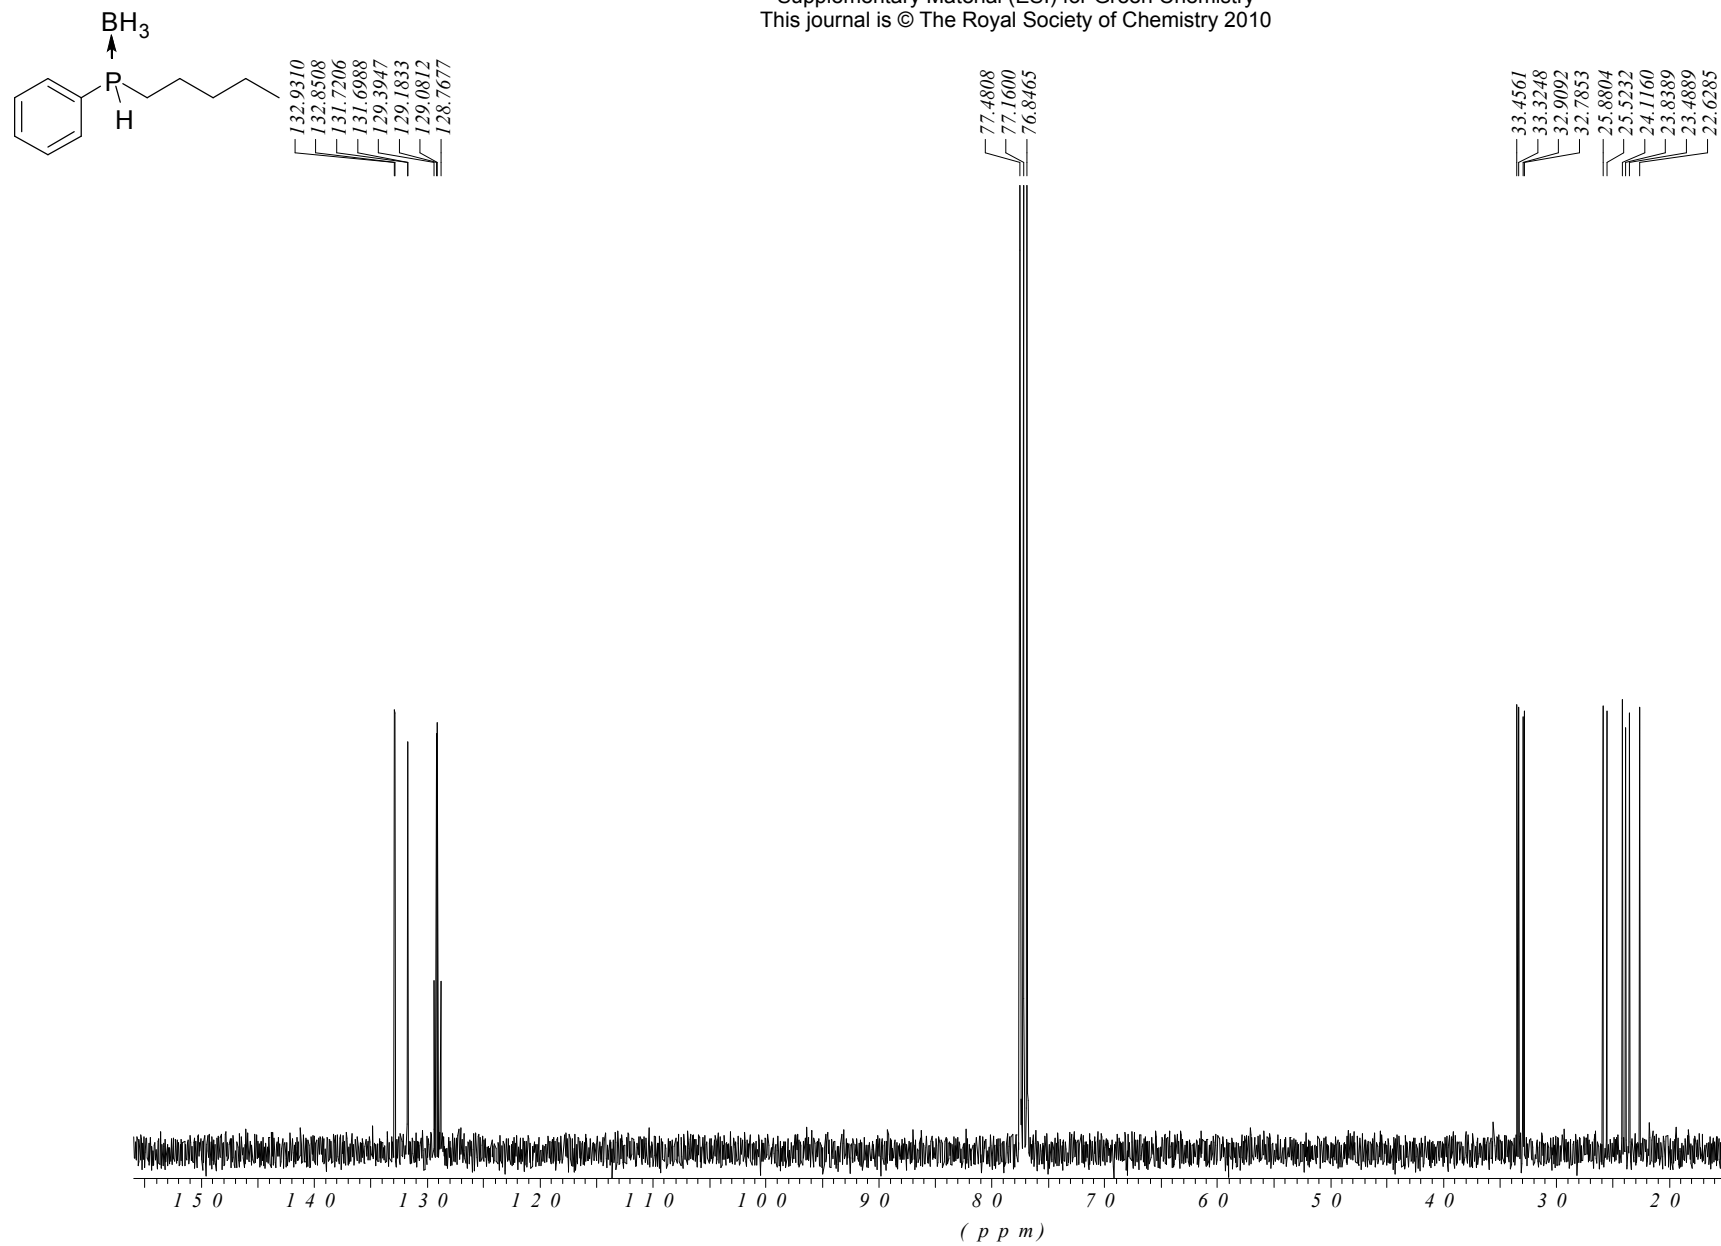

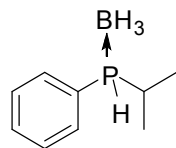

16.8588  
16.4402

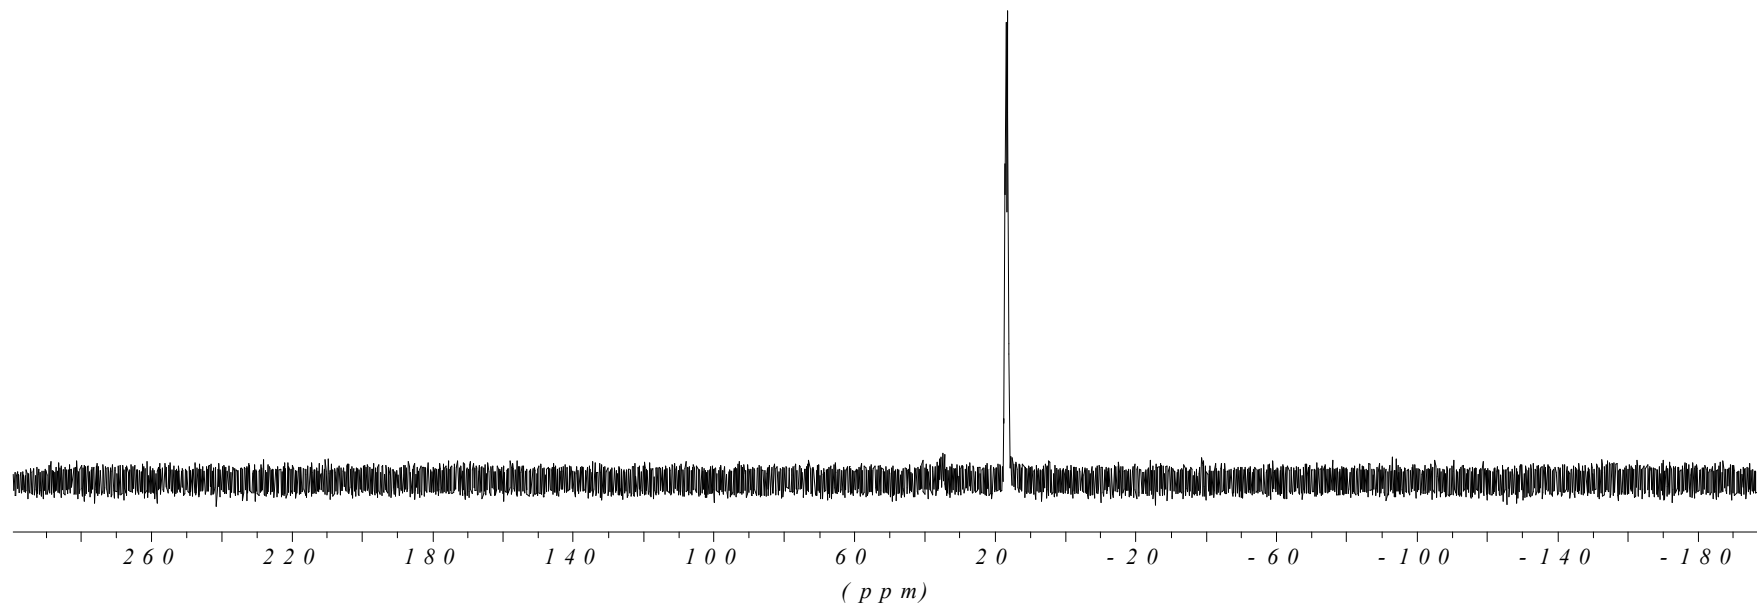

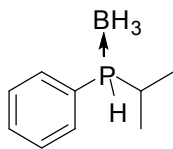

Supplementary Material (ESI) for Green Chemistry  
This journal is © The Royal Society of Chemistry 2010

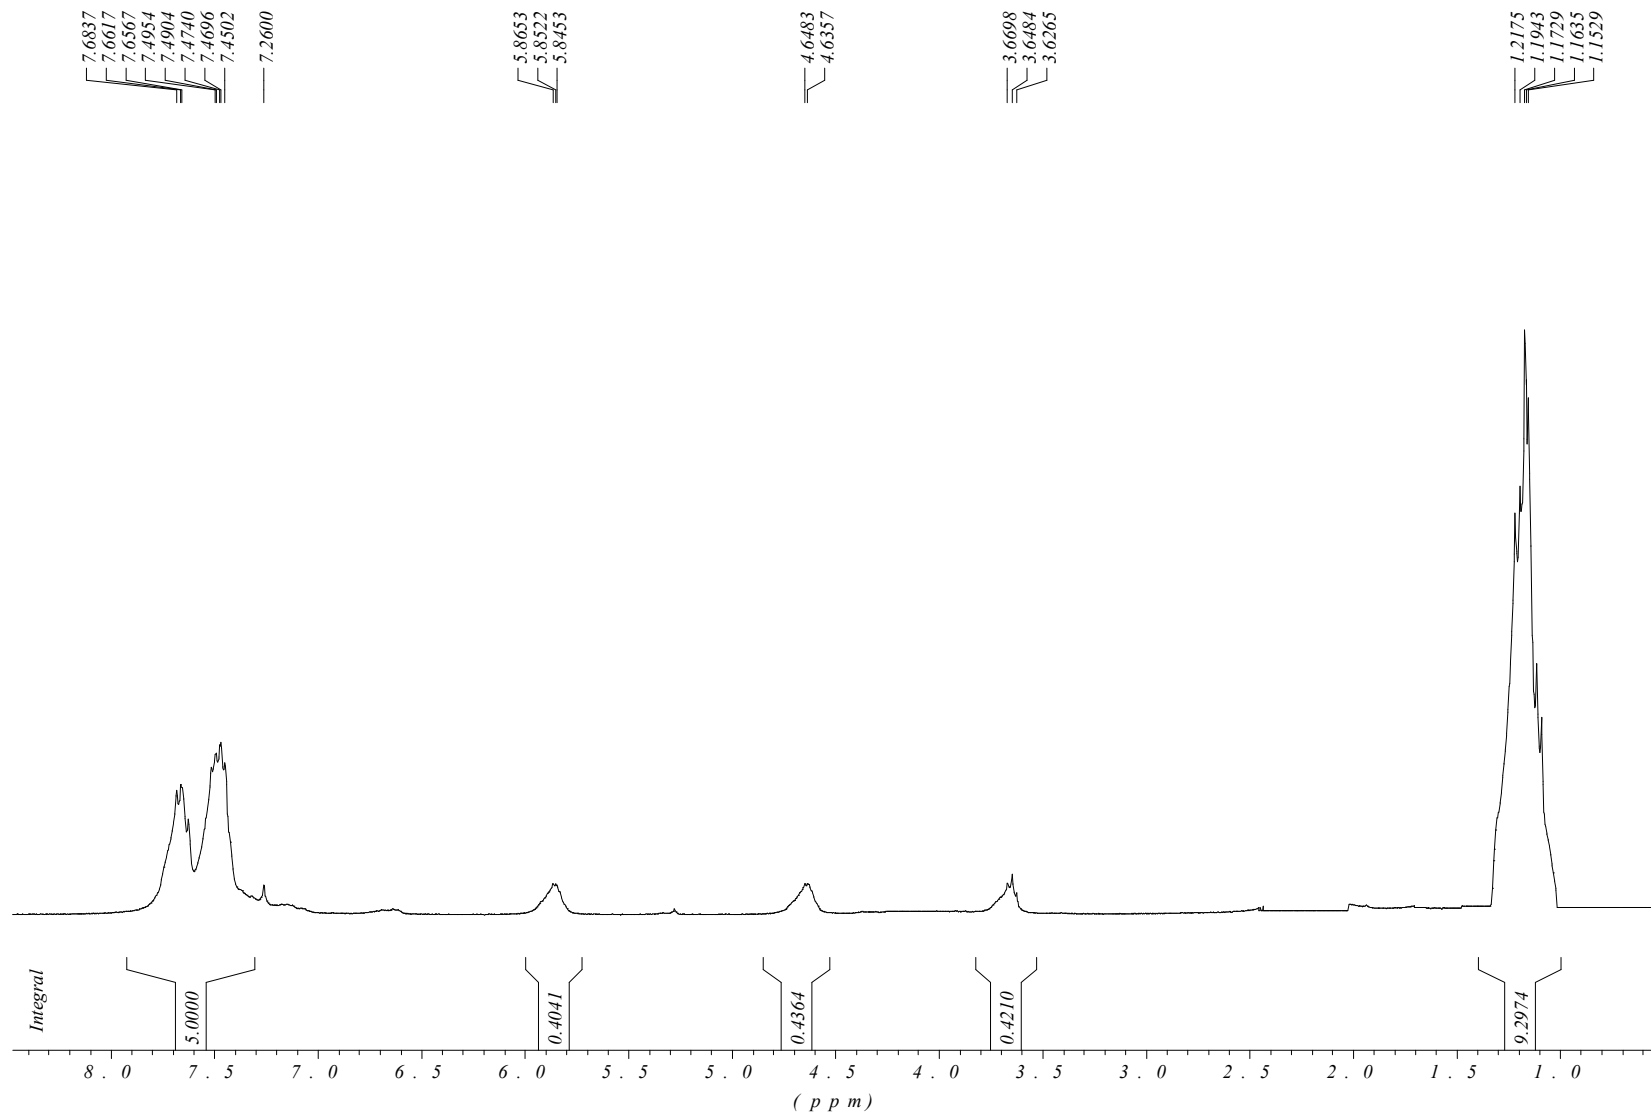

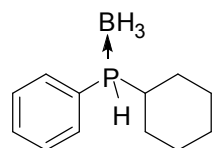

12.9921  
12.5278

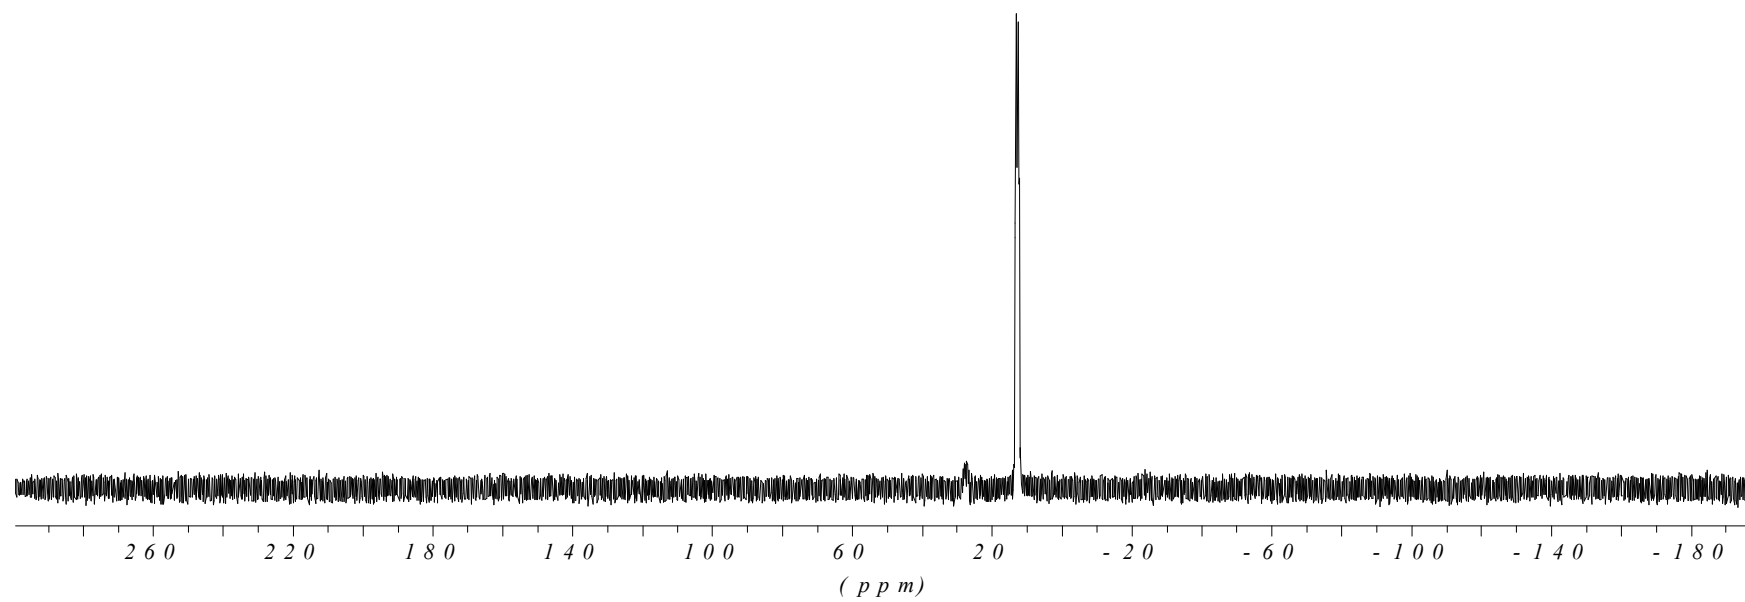

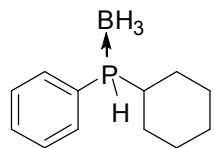

Supplementary Material (ESI) for Green Chemistry  
This journal is © The Royal Society of Chemistry 2010

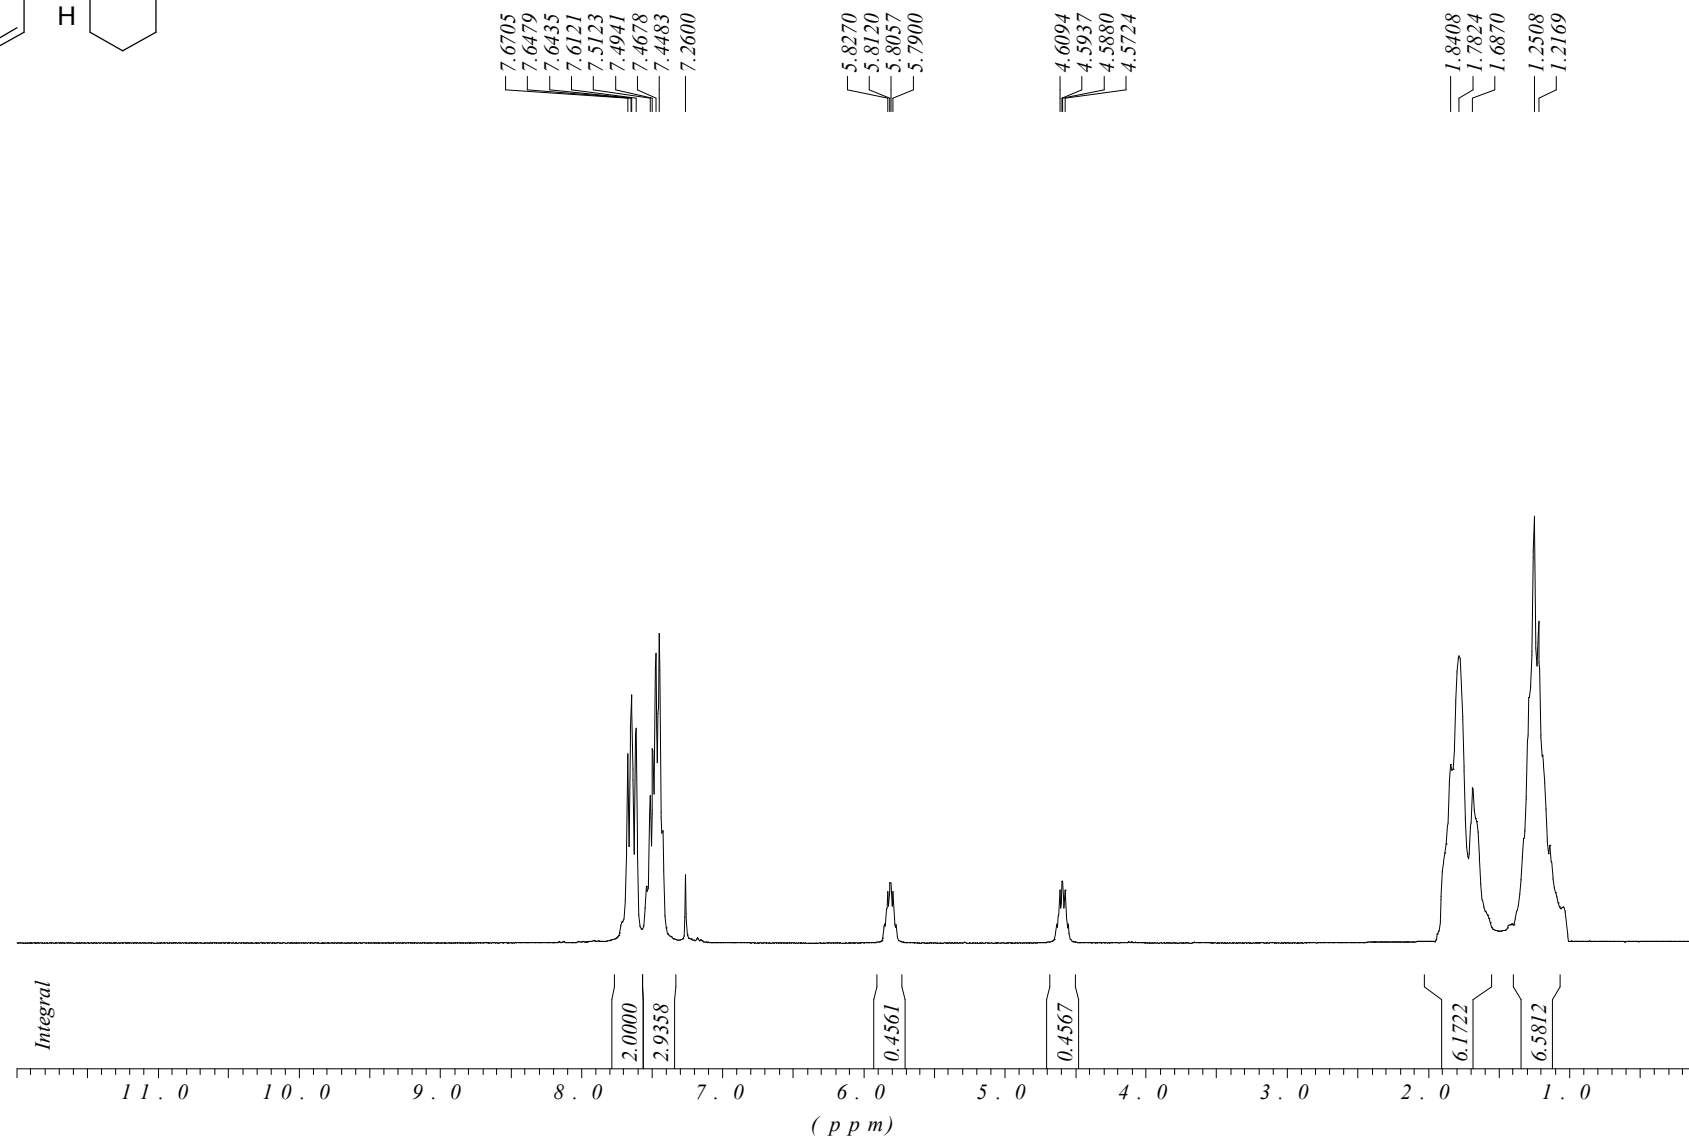

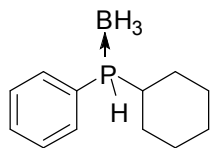

Supplementary Material (ESI) for Green Chemistry  
This journal is © The Royal Society of Chemistry 2010

133.5398  
133.4614  
131.6277  
131.6022  
128.9591  
128.8625  
125.1184  
124.5861

77.4772  
77.1600  
76.8410

33.6037  
33.2592  
28.3030  
28.2847  
27.7835  
26.5531  
26.5093  
26.4364  
26.3872  
25.6890  
25.6745

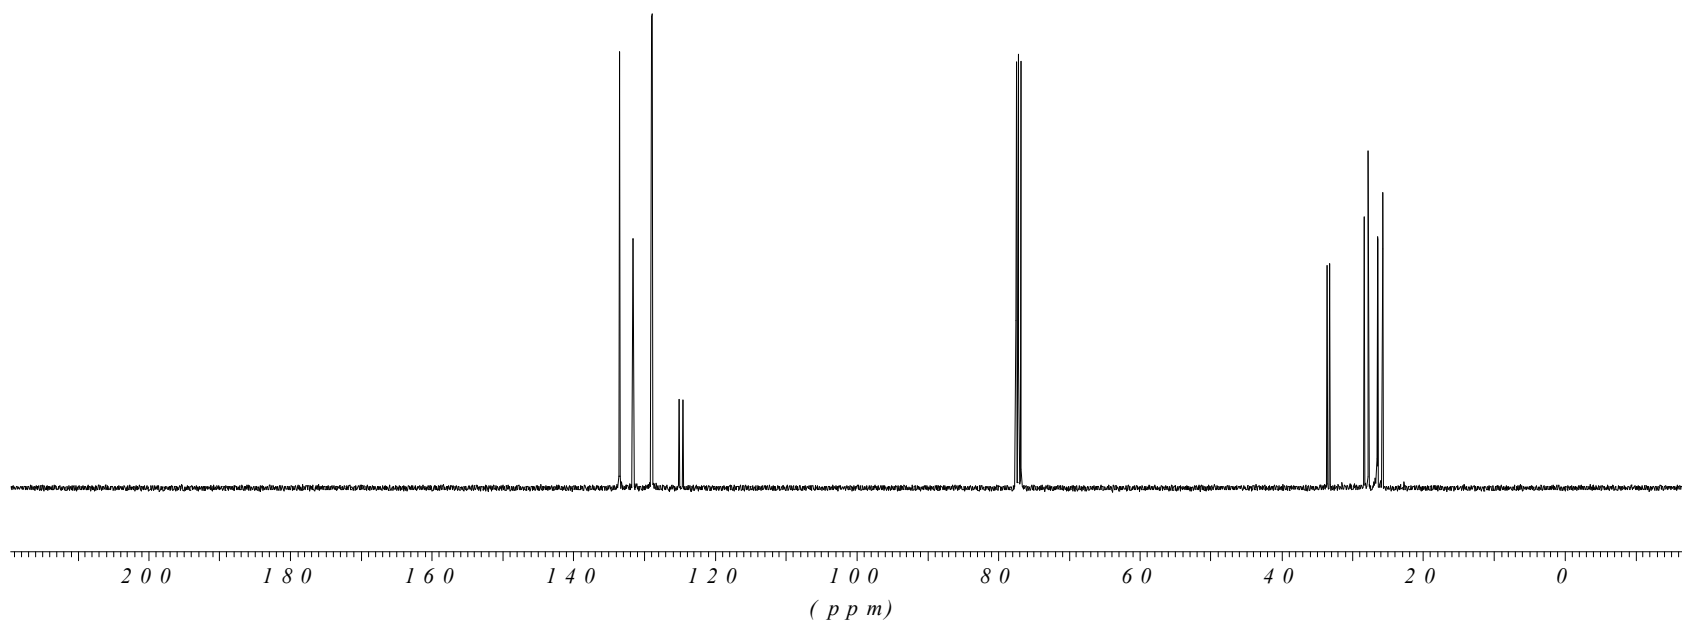

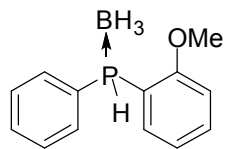

Supplementary Material (ESI) for Green Chemistry  
This journal is © The Royal Society of Chemistry 2010

-15.0111  
-15.5059

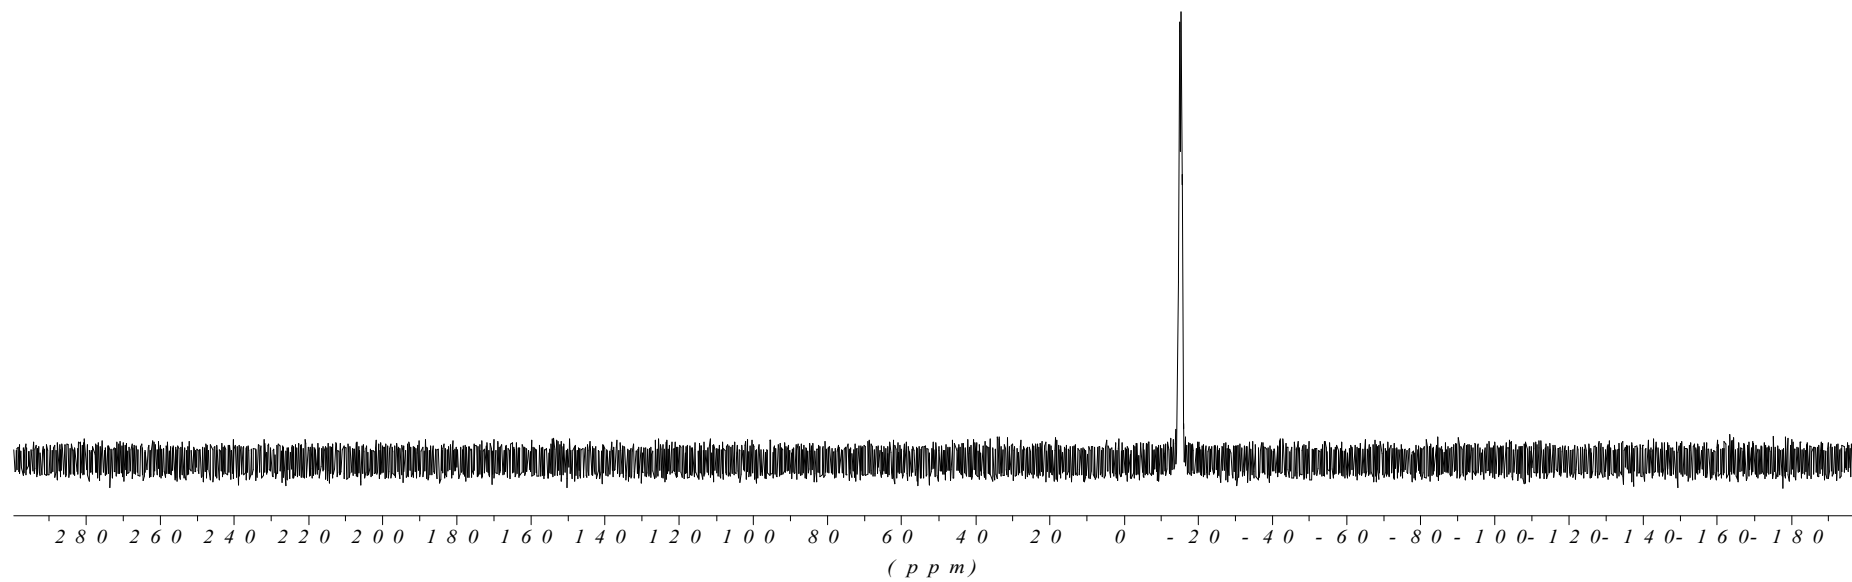

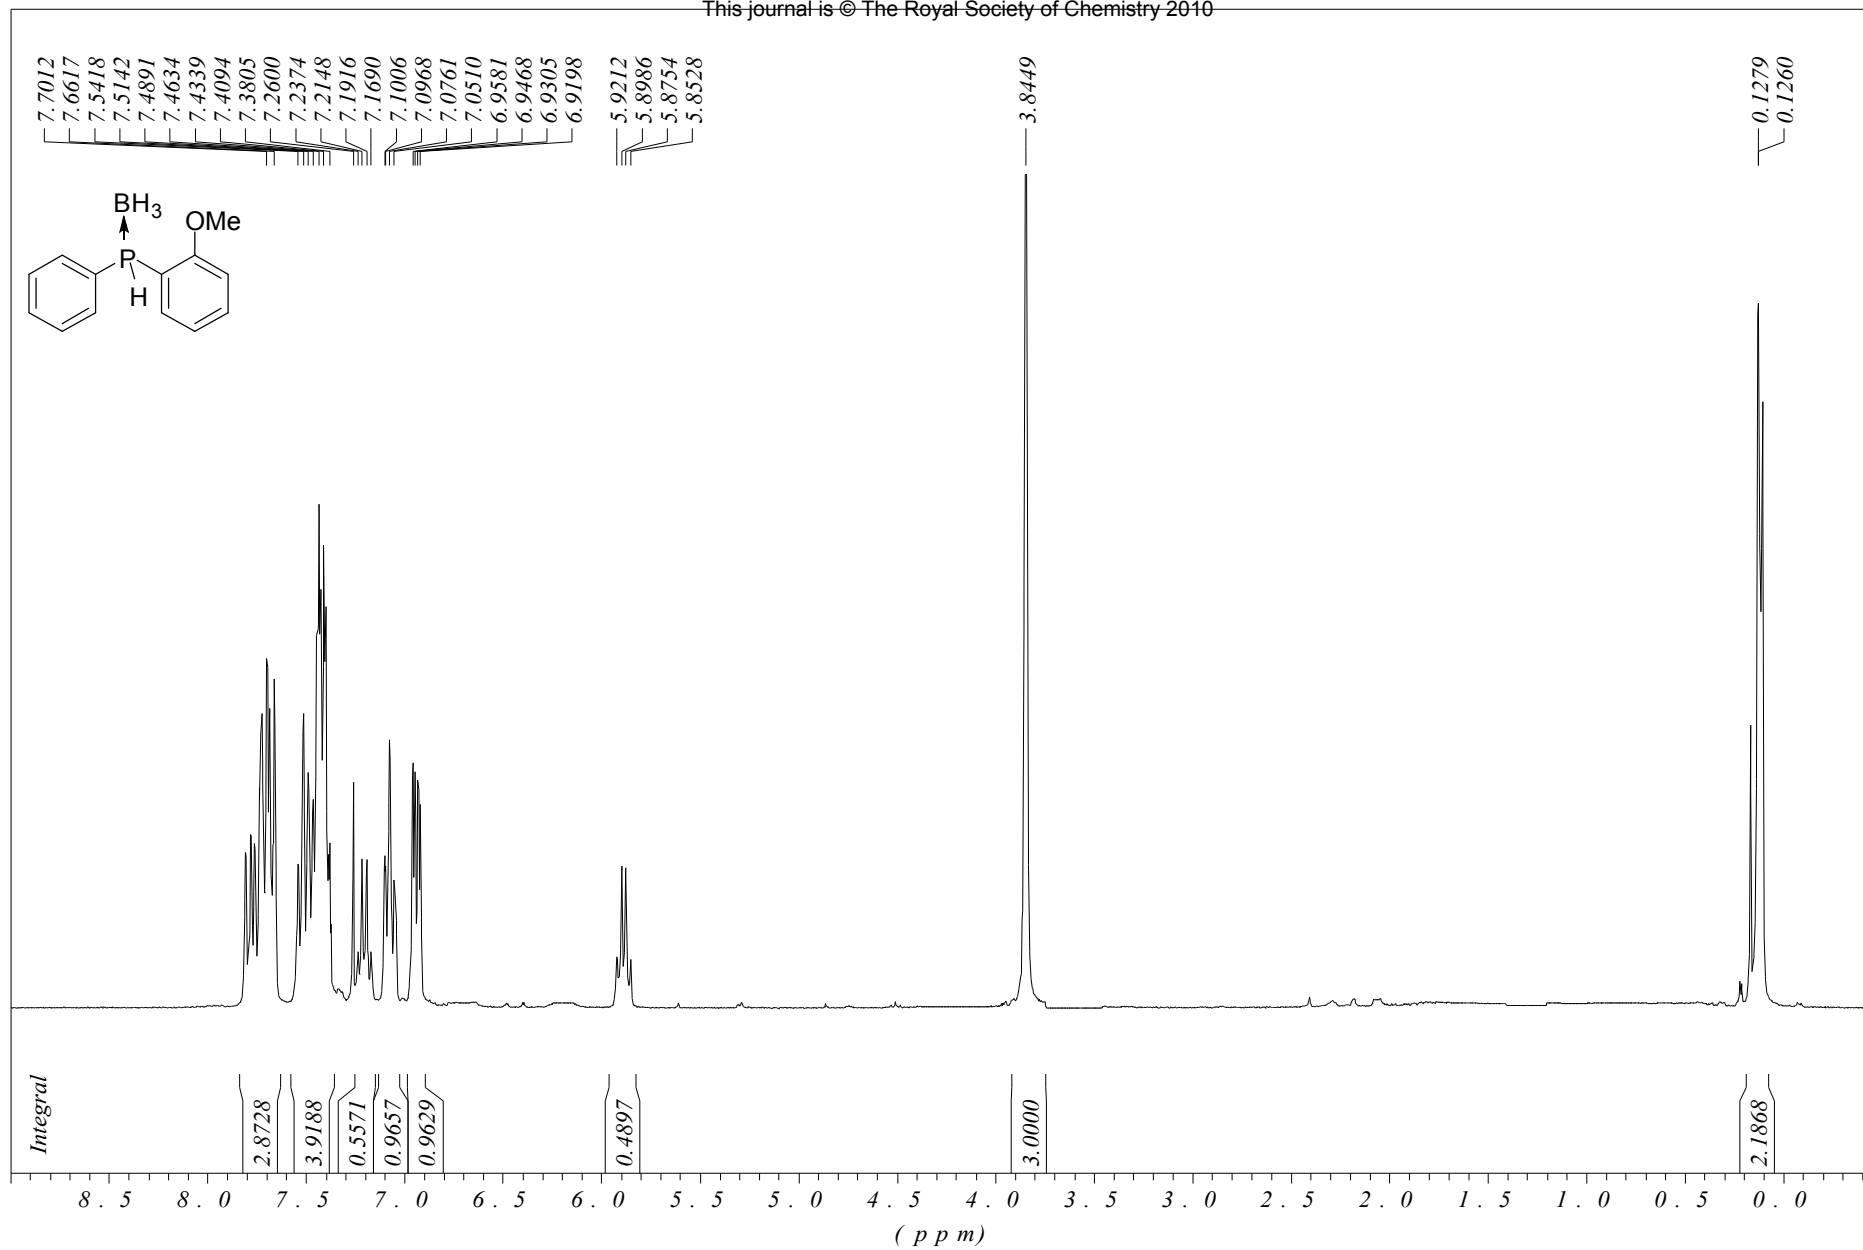



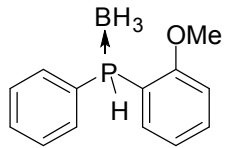

Supplementary Material (ESI) for Green Chemistry  
This journal is © The Royal Society of Chemistry 2010

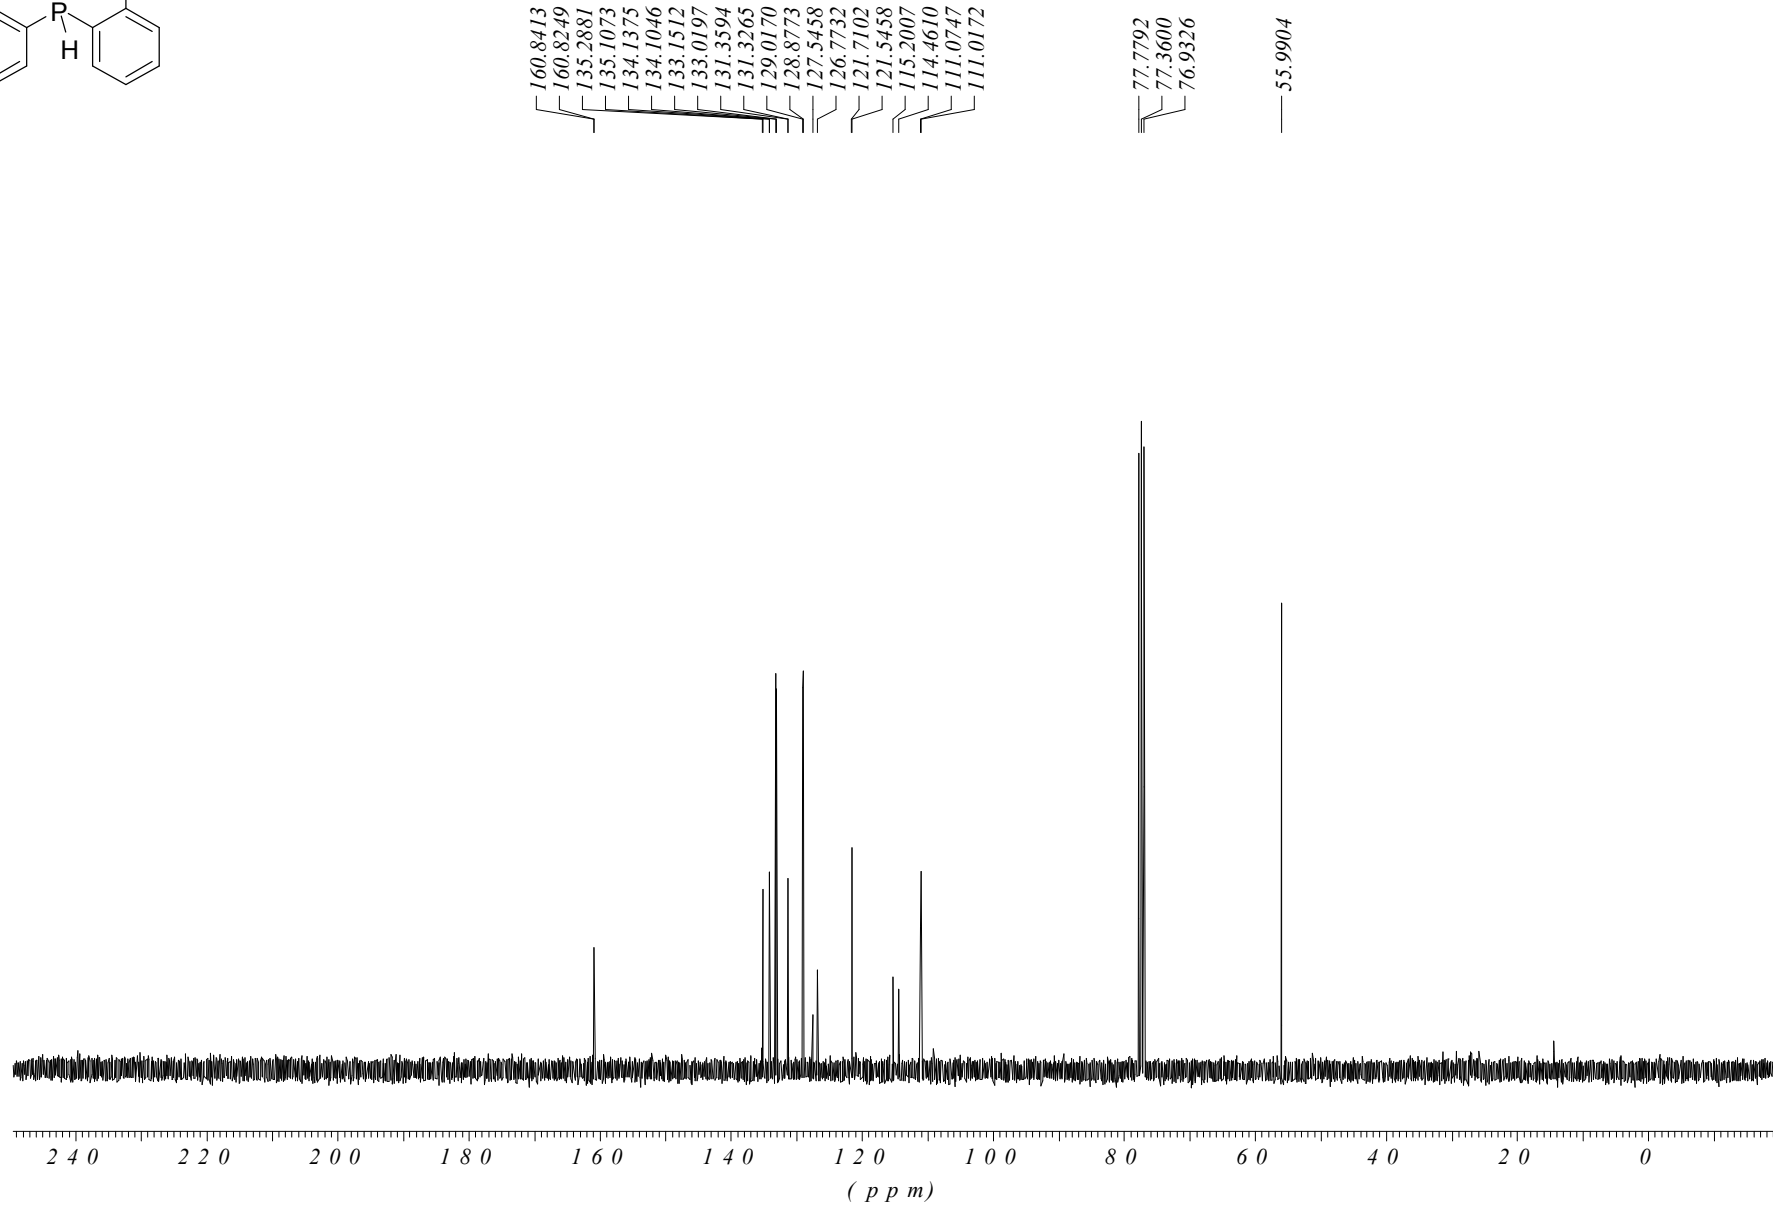

Supplement: b920324a.pdf [file b920324a.pdf]
